# Dynamical structure of cortical taste responses revealed by precisely-timed optogenetic perturbation

Narendra Mukherjee <sup>\*1</sup>, Joseph Wachukta<sup>2</sup>, and Donald B Katz <sup>†3</sup>

<sup>1,2,3</sup>*Program in Neuroscience, Brandeis University*

<sup>1,2,3</sup>*Volen National Center for Complex Systems, Brandeis University*

<sup>3</sup>*Department Of Psychology, Brandeis University*

## Abstract

The purpose of perception is driving action. During tasting, for instance, every stimulus must be either swallowed or rejected (the latter via a behavior known as “gaping”). Taste responses in the rodent primary gustatory cortex (GC) span this sensorimotor divide, progressing through a series of firing epochs that culminate in the emergence of action-related firing. Population analyses reveal this emergence to be a sudden, coherent ensemble transition that, despite varying in latency between trials, precedes gaping onset by 0.2-0.3s. Here, we tested whether this transition drives gaping, delivering 0.5s GC perturbations at various time-points in tasting trials. Perturbations significantly delayed gaping, but only when they preceded the action-related transition - thus, the same perturbation might have an impact or not, depending on the transition latency in that particular trial. Our results suggest a distributed attractor network model of taste processing, and a dynamical role for cortex in driving motor behavior.

---

\*narendra@brandeis.edu

†dbkatz@brandeis.edu

## 20 1 Introduction

21 One of the primary purposes of sensory processing is to drive action, such that the sources  
22 of sensory information can be either acquired or avoided (Prinz (1997), Wolpert and Kawato  
23 (1998), Wolpert and Ghahramani (2000)). To the extent that this is true, sensory and motor  
24 processing should be tightly coupled (Wolpert et al. (1995), Huston and Jayaraman (2011)).  
25 The gustatory system is an ideal model to study this proposed coupling, because animals  
26 necessarily respond to tastes with discriminative behaviors - specifically, they must decide to  
27 either swallow or expel the sensory stimulus in the mouth (Grill and Norgren (1978a), Katz  
28 and Sadacca (2011), Li et al. (2016)).

29 Sensory-motor coupling is visible in the temporal response patterns of rodent gustatory cor-  
30 tical (GC) neurons to taste stimulus administration. GC neurons respond to taste presentation  
31 with a sequence of firing-rate “epochs”, two of which are taste-specific: neural firing first carries  
32 information regarding the physio-chemical identity of the taste stimulus, and then correlates  
33 with palatability, a variable intimately linked with the animal’s decision to ingest or expel the  
34 taste (Katz et al. (2001), Fontanini and Katz (2006), Grossman et al. (2008), Piette et al.  
35 (2012), Sadacca et al. (2012), Maffei et al. (2012), Jezzini et al. (2013); see also Crouzet et al.  
36 (2015)). Ensemble analyses further reveal that the transition between these two epochs happens  
37 suddenly and coherently within neural ensembles (Jones et al. (2007), Sadacca et al. (2016)).  
38 This ensemble transition to palatability coding, though highly variable in latency (between 0.5  
39 and 1.5s post stimulus, depending on the trial), is a strong predictor of the onset of the ani-  
40 mal’s consumption-related orofacial behavior (Sadacca et al. (2016)), even when the timing of  
41 this behavior is manipulated by learning (Moran and Katz (2014)) or cueing (Li et al. (2016)).  
42 That is, GC neural ensembles appear to “hop” from one attractor state to another during taste  
43 processing (Miller and Katz (2010), Miller (2016)), with the hop representing the reaching of a  
44 consumption decision - and (potentially) the emission of a motor signal to brainstem circuits  
45 that generate orofacial behavior.

46 A direct prediction of this temporally dynamic model of gustatory sensorimotor processing,  
47 and most specifically of the suggestion that the transition into the later firing-rate epoch repre-  
48 sents the emission of a motor command, is that well-timed perturbations of GC activity should  
49 affect the time course of a rat’s taste-reactive ingestion-egestion behavior. This prediction re-  
50 cently received indirect support when it was shown that optogenetic inhibition of the entire  
51 GC taste response (Li et al. (2016)) modestly changes the probability of rejection behaviors in  
52 response to aversive tastes (“gapes”, Grill and Norgren (1978a), Li et al. (2016)).

53 However, such gross perturbations of gustatory processing are an inadequate test of this  
54 very specific prediction: for one thing, multi-second inactivations likely have secondary effects  
55 that confound interpretation, particularly regarding an outcome variable (ability to gape) that  
56 is known to depend on an interconnected network of brain regions (including GC; see Smith  
57 and St John (1999), Riley and King (2013), Samuelsen and Fontanini (2016)); in addition, it  
58 is impossible to disambiguate any epoch- or moment-specific effects on consumption behavior  
59 using whole-response perturbations. A much more definitive test would involve using optoge-

60 netics to inhibit GC taste responses for short periods of time as awake rats process and respond  
61 to a range of tastes.

62 Here we report the results of this precise experiment, performed in awake, tasting rats.  
63 We recorded the activity of GC ensembles while simultaneously inhibiting the firing of these  
64 neurons using an optogenetic silencer (specifically, the proton-pump ArchT) for brief (0.5s)  
65 periods before, during or after the “hop” to the palatability- (i.e., decision-) related state. Our  
66 results provide strong support for the hypothesized importance of the transition time itself,  
67 and in addition suggest that important pre-transition taste processing is performed within GC.  
68 Furthermore, our data provide a glimpse into the attractor-like dynamics underlying the neural  
69 processing of taste, demonstrating that GC is one participatory node in a larger network with  
70 attractor dynamics: the fact that GC perturbations only delay the system settling into the  
71 decision-related “stable” state suggests that this stable state is a function of activity spread  
72 across multiple regions; in addition, the fact that post-decision perturbations have no impact  
73 suggests that behavioral control shifts to brainstem circuits once this stable state has been  
74 reached.

## 75 2 Materials and Methods

### 76 2.1 Experimental design

#### 77 2.1.1 Subjects

78 Adult, female Long-Evans rats (n=5; 275-300g at time of virus injection; 300-350g at time of  
79 electrode implantation) served as subjects in our study (in our hands, female Long-Evans rats  
80 have proven more docile than males, but we have observed no sex differences in the basic cortical  
81 dynamics of taste responding). The rats were housed in individual cages in a temperature and  
82 humidity controlled environment under a 12:12h light:dark cycle. All rats were given *ad libitum*  
83 access to food and water before experiments started. Rats were weighed daily and observed to  
84 never drop below 80% of their pre-surgery weight. All experimental methods were in compliance  
85 with National Institutes of Health guidelines and were approved in advance by the Brandeis  
86 University Institutional Animal Care and Use Committee.

87 We also performed a set of control analyses on data taken from 10 adult, female Long-Evans  
88 rats, previously published in [Sadacca et al. \(2016\)](#) and [Li et al. \(2016\)](#).

#### 89 2.1.2 Virus injections

90 We injected adeno-associated virus (AAV9) coding for ArchT and green fluorescent protein  
91 (AAV9-CAG-ArchT-GFP,  $2.5 \times 10^{11}$  particles per mL) into GC. This AAV serotype has been  
92 shown to effectively spread to and infect all cell types ([Aschauer et al. \(2013\)](#)) in regions  
93 including GC ([Maier et al. \(2015\)](#), [Li et al. \(2016\)](#)).

94 Rats were first anesthetized using a ketamine/xylazine mixture (1mL ketamine, 0.05 mL  
95 xylazine/kg body weight) delivered *via* an intra-peritoneal injection. Supplemental anesthetic  
96 injections were given as needed. The head was shaved, cleaned with an iodine solution and  
97 70% ethanol, and positioned into the stereotax. We then excised the scalp and cleaned and  
98 leveled the top of the skull. Small craniotomies were drilled bilaterally over the location of GC  
99 (anteroposterior +1.4mm from bregma, mediolateral  $\pm 5$ mm from bregma; [Paxinos and Watson](#)  
100 [\(2007\)](#)), the meningeal tissues were gently excised, and virus was infused.

101 We lowered a glass micro-pipette (tip diameter: 10-20 $\mu$ m) filled with the infusate - virus  
102 particles suspended in a solution of phosphate-buffered saline (PBS) and Oregon Green 488  
103 (Invitrogen) - into the centers of the craniotomies, and performed a sequence of 3 injections  
104 bilaterally into GC: at 4.9, 4.7 and 4.5mm ventral to dura, virus was injected in discrete  
105 pulses (44 pulses/location, with 25nL per pulse, 7s between consecutive pulses = 1.1 $\mu$ L total  
106 volume injected per depth) controlled by a Nanoject III microinjector (Drummond Scientific).  
107 Following each unilateral set of injections, the micropipette remained in place for 5 min, after  
108 which it was smoothly removed over the course of 1 minute so that fluid would not spread back  
109 up the micro-pipette track. Craniotomies were then sealed with silicone (Kwik-Sil, WPI), the  
110 scalp was sutured, and the rat was given analgesic (meloxicam 0.04mg/kg), saline and antibiotic  
111 (Pro-Pen-G 150,000U/kg) injections. Similar antibiotic and analgesic injections were delivered

112 24 and 48 hours later.

113 Rats were allowed to recover for 4-6 weeks from this procedure, in order to ensure adequate  
114 infection and subsequent expression of optical channels (ArchT) and GFP.

### 115 **2.1.3 Opto-trode, intra-oral cannula and EMG electrode implantation**

116 After recovery from virus infusion surgery, rats were again anesthetized, and implanted with  
117 bilateral GC opto-trode bundles. Each bundle consisted of either 30 or 32 recording microwires  
118 (0.0015inch formvar-coated nichrome wire; AM Systems) and 1 optical fiber (0.22 numerical  
119 aperture, 200 $\mu$ m core, inserted through a 2.5mm multimode stainless-steel ferrule; Thorlabs).  
120 The microwire bundle was glued to a custom-made electrode-interface board (San Francisco  
121 Circuits) and connected to a 32 channel Omnetics connector. In the case of the 30 microwire  
122 bundles, the final two pins were connected to 2 electromyography (EMG) electrodes (PFA-  
123 coated stainless steel wire; AM Systems) implanted into the digastric muscle under the jaw.  
124 Finally, the microwires and optical fiber were connected to a custom-built 3D printed microdrive  
125 that allowed the entire assembly to be moved ventrally after implantation. The microwire tips  
126 were located 0.5mm ventral to the tip of the optical fiber - this maximized the likelihood  
127 that the electrodes recorded the activity of neurons that were illuminated by the laser. For  
128 more information on the implanted apparatus and associated electronics, see [Katz et al. \(2001\)](#),  
129 [Sadacca et al. \(2016\)](#) and [Li et al. \(2016\)](#), as well as the [Katz Lab webpage](#).

130 Rats were anesthetized, after which we shaved and cleaned the scalp and situated the head  
131 in the stereotax. After excising the scalp and leveling the skull, we drilled 5 self-tapping screws  
132 into the skull for supporting and grounding the opto-trode bundles. The silicone seal was  
133 removed from the craniotomies, as were any tissues that had grown in since the prior surgery.  
134 We then slowly (over 5-10 minutes) lowered the opto-trode bundles to a depth of 4.3mm from  
135 the dura mater (0.2mm above the most dorsal location of virus injection). The ground wires  
136 were wound tightly around the skull screws and the bundles were cemented in place with  
137 dental acrylic. The optical fiber was looped so that the ferrule could be cemented away from  
138 the microdrive - this configuration reduced the stress on the microdrive when the animal was  
139 later plugged in to the experimental apparatus.

140 Once the opto-trode assembly was cemented in place, the rat was removed from the stereotax  
141 and implanted with a single (right-side) intra-oral cannula (IOC) for controlled delivery of  
142 tastants on the tongue. IOCs were made with thin polyethylene tubing and inserted in the  
143 space between the first maxillary molar and the lip, through the masseter muscle and inside  
144 the zygomatic arch, and out through the opening in the scalp ([Phillips and Norgren \(1970\)](#),  
145 [Katz et al. \(2001\)](#)) The IOC was topped with a plastic connector that could be attached to the  
146 taste delivery apparatus, and cemented in place with dental acrylic.

147 The EMG electrodes were channeled down the left side of the face (opposite from the IOC);  
148 after the overlying skin had been teased away from the belly of the digastric muscle, one end  
149 of each EMG electrode was tied to a suture needle, which was then inserted into the muscle,  
150 such that the electrode could be pulled into the desired position (for more details, see [Loeb and](#)

151 [Gans \(1986\)](#); [Travers and Norgren \(1986\)](#); [Dinardo and Travers \(1994\)](#); [Li et al. \(2016\)](#)). The  
152 electrode wires were trimmed and held in place with vetbond tissue adhesive (3M) and the skin  
153 covering the anterior digastric was sutured back into place. Finally, a modified falcon tube was  
154 glued to the front of the headcap as a protective cap, and bacitracin ointment was applied all  
155 around the base of the headcap and over the wound under the jaw.

156 Rats were postoperatively injected with analgesic (Buprenorphine 0.05mg/kg), saline, and  
157 antibiotic (Pro-Pen-G 150,000U/kg). Similar antibiotic, saline and analgesic injections were  
158 delivered 24, 48 and 72 hours later, and bacitracin ointment was reapplied. The rats were  
159 handled every day and allowed to recover to 90% of their pre-surgery weight (at least 7 days  
160 after surgery) before being introduced to the experimental apparatus.

#### 161 **2.1.4 Habituation**

162 Following recovery from the opto-trode implantation surgery, we habituated rats to passive  
163 water deliveries for 3 days before beginning data collection. In these daily habituation sessions,  
164 we attached the rats to the electrophysiology acquisition system, laser patch cables and taste  
165 delivery apparatus, and infused 100 pulses of distilled water ( $\sim 40\mu\text{L}$  per pulse; 15s inter-pulse  
166 interval) into the animal's oral cavity through the IOC. Starting with the second habituation  
167 day, we also placed rats on a mild water restriction schedule - 20mL of water (not including the  
168 4mL delivered during habituation sessions themselves) per day. This water restriction schedule  
169 was maintained for the duration of the study ( $\sim 7$  days per animal).

170 Opto-trode bundles were driven deeper after each habituation session using the microdrive  
171 built into the assembly; by the end of the habituation period, the distance traveled was 0.2mm,  
172 such that the tips of the electrodes lay within the region of GC infected with the virus.

#### 173 **2.1.5 Passive taste administration and laser stimulus delivery**

174 We used 2 concentrations of palatable sucrose (30mM: Dilute Sucrose (Dil Suc), 300mM: Con-  
175 centrated Sucrose (Conc Suc)) and of aversive quinine-HCl (0.1mM: Dilute Quinine-HCl (Dil  
176 Qui), 1mM: Concentrated Quinine-HCl (Conc Qui)) dissolved in distilled water as the stimuli in  
177 our experiments. Concentrated sucrose and quinine are rich in palatability-related valence and  
178 evoke strong orofacial responses; the dilute stimuli are of similar but far less extreme palatabil-  
179 ity – a fact that aided in the analysis of palatability-related neural firing ([Li et al. \(2016\)](#)); see  
180 also below). The taste delivery apparatus consisted of gently pressurized tubes containing taste  
181 solutions; the tubes converged upon a manifold of finer polyamide tubes that could be inserted  
182 into (to 0.5 mm past the end of) the IOC, thus eliminating any chance of mixing. The manifold  
183 could be locked securely into the dental acrylic cap. The tastes were then delivered under slight  
184 nitrogen pressure - this taste delivery protocol has been consistently shown to ensure reliable  
185 tongue coverage at short latencies ([Katz et al. \(2001\)](#), [Sadacca et al. \(2016\)](#), [Li et al. \(2016\)](#)).

186 Data were collected during 2 types of optogenetic perturbation sessions: 1) sessions made up  
187 of “long” perturbation trials in which the laser was turned on for the period of 0-2.5s post taste  
188 delivery; and 2) sessions made up of “short” perturbation trials in which the laser was turned

189 on for 0.5s at either 0.0, 0.7, or 1.4s post taste delivery. One experimental session was run per  
190 day. Some rats received only the latter (short-perturbation) session; for those that received  
191 both, we counterbalanced session type, such that a rat that experienced 2.5s perturbations in  
192 one session got 0.5s perturbations the following day, and *vice versa* (see below).

193 Sessions with 2.5s perturbations consisted of 8 sets of trials (2 sets per taste - one with  
194 the lasers on and one with no laser). Each set included 15 trials, for a total of 120 trials per  
195 session. Similarly, sessions with 0.5s perturbations included 16 sets of trials (4 sets per taste  
196 - one with lasers on from 0.0-0.5s, one with lasers on from 0.7-1.2s, one with lasers on from  
197 1.4-1.9s, and one with no lasers). To keep the total number of trials per session from ballooning  
198 (a basic concern in taste research is the awake animal's finite appetite), each set included only 8  
199 trials (total, 128 trials per session). Again, we moved the opto-trode bundle 0.075mm ventrally  
200 (deeper into GC) prior to each session, to ensure that we obtained fresh units in every session.  
201 Trials were delivered in pseudo-random order and each involved delivery of  $\sim 40\mu\text{L}$  of fluid  
202 through the IOC, for a total volume of 5mL per session.

203 We used a 532nm, DPSS laser (Laserglow Technologies), connected to the implanted ferrules  
204 using standard FC/PC patch cables (Thorlabs), for all optogenetic perturbations. Taste and  
205 laser delivery were controlled through a Raspberry Pi computer. The strength of the laser input  
206 was calibrated, prior to opto-trode implantation, to yield an illumination power of 40mW at  
207 the tip of the optical fiber. This output power perturbs all ArchT infected neurons in a  $1\text{mm}^3$   
208 sphere below the tip of the fiber *in vivo* (Han et al. (2011), Yizhar et al. (2011)) - a sphere  
209 that encompasses about 33% of GC in the caudal-rostral axis (Kosar et al. (1986), Maier et al.  
210 (2015), Li et al. (2016)). These parameters have previously been shown to reduce the activity  
211 of ArchT+ cortical neurons with minimal latency and damage (Maier et al. (2015), Li et al.  
212 (2016), Flores et al. (2018)).

### 213 **2.1.6 Acquisition of electrophysiological data**

214 We collected 30k voltage samples per second from each implanted neural and EMG electrode,  
215 using a 32-channel analog-to-digital converter chip (RHD2132) from Intan Technologies. These  
216 chips are capable of recording voltage signals over a wide range of frequencies (0.1Hz-20kHz)  
217 and amplitudes (microvolts to millivolts), thereby enabling us to record neural and EMG signals  
218 through the same hardware system. The experimental chamber was ensconced in a Faraday  
219 cage that shielded recordings from external electrostatic and electromagnetic influences.

### 220 **2.1.7 Histology and evaluation of GFP expression**

221 In preparation for histology, rats were deeply anesthetized with an overdose of the ketamine/xylazine  
222 mixture, after which DC current ( $7\mu\text{A}$  for 7s) was passed through selected microwires, marking  
223 the area below the electrode tips. We perfused the rats through the heart with 0.9% saline  
224 followed by 10% formalin and harvested the brain. The brain tissue was incubated in a fixing  
225 mixture of 30% sucrose and 10% formalin for 7 days before GC was sectioned into  $50\mu\text{m}$  coronal  
226 slices.

227 We rinsed the slices 3 times with 1X-PBS over 15 minutes and permeabilized them in a  
228 0.3% Triton X-100+1% normal Donkey serum+1X-PBS blocking solution for 2 hours at room  
229 temperature. We replaced the blocking solution with primary antibody solution (1:500 anti-  
230 GFP-rabbit IgG; Life Technologies) for 12 hours at 4°C. After incubation with the primary  
231 antibody, the slices were rinsed with 1X-PBS 3 times over 15 minutes followed by incubation  
232 with the secondary antibody incubation of (1:200 Alexa Flour 488 donkey anti-rabbit IgG  
233 (H+L); Life Technologies) for 12 hours at 4°C. After a final set of rinses with 1X-PBS (3 times  
234 over 15 minutes), we mounted the slices on charged glass slides and cover-slipped them with  
235 Fluoromount Aqueous Mounting Medium. Slices were imaged with a Keyence fluorescence  
236 microscope to confirm successful virus infection and opto-trode location for each animal.

237 The spread of AAV in GC was evaluated *via* the expression of GFP, as has been done  
238 previously (Maier et al. (2015), Li et al. (2016), Flores et al. (2018)).

## 239 2.2 Data analysis

240 Most statistical analyses in this paper were performed using Bayesian methods implemented  
241 in the PyMC3 probabilistic programming package (Salvatier et al. (2016)). Although the far  
242 more common practice in the literature is to implement analyses similar to ours in a frequen-  
243 tist/maximum likelihood estimation (MLE) paradigm, the Bayesian approach offers several  
244 advantages. For one, Bayesian statistics provides a natural way to infer the entire joint pos-  
245 terior distribution of the model parameters in the light of the data at hand. This allows the  
246 Bayesian methodology to make robust inferences without being constrained by the sampling-  
247 related assumptions of parametric frequentist statistics or the lack of statistical power of non-  
248 parametric frequentist techniques. Relatedly, the flexibility of the Bayesian framework allows  
249 the construction of statistical models appropriate for the data-generating process that can in-  
250 clude non-standard (such as multi-modal) parameter distributions. Such models (of which we  
251 use several in this study) often cannot be accommodated by frequentist approaches at all, even  
252 if they are “true” descriptions of the underlying generative process. Finally, despite working  
253 with highly flexible models, Bayesian approaches provide the added advantage of using model  
254 priors to regularize parameter estimates - we use “weakly informative” priors in our analyses  
255 that are known to reduce the susceptibility of the inference process to noise by penalizing model  
256 flexibility (unless supported by the observed data).<sup>1</sup> We will describe the properties of each  
257 statistical model used in our analyses, and our specific prediction(s) for each such model, in  
258 the sub-sections below.

259 Recent advances in statistical computing have made it possible to circumvent the analytical  
260 challenges that have historically plagued the application of Bayesian techniques to many prac-  
261 tical problems. In particular, new Markov Chain Monte Carlo (MCMC) techniques have been  
262 developed to facilitate arriving at an approximation to the posterior distribution of the model  
263 parameters by drawing samples from it. We performed inference in our Bayesian probabilistic

---

<sup>1</sup>For a detailed comparison of frequentist and Bayesian estimation in statistics and a discussion of weakly informative priors, please refer to Gelman et al. (2013) and McElreath (2015).



264 models using the No-U-Turn-Sampler (NUTS; [Hoffman and Gelman \(2014\)](#)), a state-of-the-art,  
265 self-tuning Hamiltonian MCMC algorithm that efficiently draws samples from the posterior  
266 distribution described by the data at hand. The performance of the sampler can be evaluated  
267 by running several independent sampling chains - a properly tuned sampler that explores the  
268 parameter space in an unbiased manner and draws samples from the correct posterior distri-  
269 bution will result in all the chains “converging” to the same distribution. Statistically, this is  
270 evaluated by computing the Gelman-Rubin  $\hat{R}$  statistic ([Gelman et al. \(2011\)](#)) across all the  
271 sampling chains.  $\hat{R}$  close to 1 indicates that the sampling runs have converged and produced  
272 samples from the same posterior distribution (we allow values from 0.99 to 1.01). Each analysis  
273 finally reports the uncertainty for the inferred parameters as 95% credible intervals - essentially  
274 the interval that covers 95% of the probability mass under the posterior distribution of the pa-  
275 rameters. Credible intervals inherently serve as significance tests in this setting - for instance,  
276 if the 95% credible interval for an estimated parameter does not overlap 0, we can conclude  
277 that this parameter is different from 0 at the 5% level of significance.

### 278 **2.2.1 Single unit isolation**

279 We followed a semi-supervised spike sorting strategy: intra-cranial voltage data was filtered  
280 between 300-3000Hz, and a Gaussian Mixture Model (GMM) identified potential clusters which  
281 were refined manually. For more details on our spike sorting methods and its efficacy in isolating  
282 single units, please consult [Mukherjee et al. \(2017\)](#). Our spike sorting code is freely available  
283 at [blech\\_clust](#).

### 284 **2.2.2 Impact of optogenetics on neural firing**

285 We built a hierarchical Poisson generalized linear model (GLM) for the spiking of a single neuron  
286 to evaluate the impact of optogenetic perturbations on firing. Hierarchical GLMs provide precise  
287 estimates of condition-specific model parameters, especially when they are expected to vary  
288 around condition-agnostic means. In our case, the model parameters are the mean firing rates  
289 for every taste and optogenetic condition, that are in turn composed of taste- and optogenetic-  
290 specific effects (“random effects”) and means across tastes and optogenetic conditions (“fixed  
291 effects”). Coupled with the Poisson distribution’s suitability for count (here spikes) data, this  
292 model can accurately estimate the change in neural firing induced by optogenetic perturbations.

293 For each neuron  $n$  in our dataset, we aggregated the spikes produced on trial  $i$  of taste  $T$  in  
294 optogenetic condition  $O$ . There were 4 levels for  $T$  corresponding to the tastes in our dataset:  
295 Dil Suc, Conc Suc, Dil Qui and Conc Qui. The number of levels for  $O$  depended on the type  
296 of optogenetic perturbation being delivered in the session: in the 2.5s perturbation sessions,  
297  $O$  had two levels, corresponding to the laser off (control) and on trials respectively; the 0.5s  
298 perturbation sessions had 3 types of perturbation trials - starting at 0s, 0.7s or 1.4s after taste  
299 delivery - and therefore had 6 levels for  $O$  (a “laser off-laser on” pair for each of the 3 types  
300 of perturbations). Our model posits that the aggregate number of spikes  $S_{n,i,T,O}$  is Poisson-  
301 distributed with a mean ( $firing_{n,T,O}$ ) that depends on the taste ( $\mu_T$ ), optogenetic condition

302  $(\mu_O)$  and an interaction between the taste and optogenetic condition  $(\mu_{T,O})$ . As described above,  
303 owing to the hierarchical structure of the model, each of these effects is further composed of a  
304 fixed effect and a random effect. Using weakly informative Gaussian and Half-Cauchy priors  
305 for the mean and variance parameters respectively, our model formally says:

$$\begin{aligned} \text{Fixed effects: } & F_1, F_2, F_3 \sim \mathcal{N}(0, 10) \\ \text{Variances: } & \sigma_1, \sigma_2, \sigma_3 \sim \text{HalfCauchy}(1) \\ \text{Taste-specific means: } & \mu_T \sim \mathcal{N}(F_1, \sigma_1) \\ \text{Optogenetics-specific means: } & \mu_O \sim \mathcal{N}(F_2, \sigma_2) \\ \text{Taste-and-optogenetics-specific means: } & \mu_{T,O} \sim \mathcal{N}(F_3, \sigma_3) \\ \text{Mean firing rate (with log link): } & \log(\text{firing}_{n,T,O}) = \mu_T + \mu_O + \mu_{T,O} \\ \text{Observed number of spikes: } & S_{n,i,T,O} \sim \text{Poisson}(\text{firing}_{n,T,O}) \end{aligned} \tag{1}$$

306 As explained in the introduction to the data analysis section, we used MCMC (specifically  
307 the NUTS sampler) to sample the posterior distribution of  $\text{firing}_{n,T,O}$  for every taste and  
308 optogenetics condition. We performed this analysis for every neuron in our dataset and finally  
309 calculated the impact of optogenetics on firing as the difference in  $\text{firing}_{n,T,O}$  between laser off  
310 (control) and their corresponding laser on trials. If the 95% Bayesian credible interval for these  
311 differences in  $\text{firing}_{n,T,O}$  for a neuron did not overlap 0, we concluded that the optogenetics  
312 significantly impacted the firing of this neuron (see the introduction to the data analysis section  
313 for a discussion of how Bayesian credible intervals inherently serve as significance tests).

### 314 2.2.3 Regression of single neuron firing with palatability ranks

315 We analyzed, as we have done previously (Sadacca et al. (2016)), the time course of palatability-  
316 related information in the activity of single neurons by regressing their firing rates on the  
317 palatability ranks of the tastes (Dil Suc: 3, Conc Suc:4, Dil Qui: 2, Conc Qui: 1; higher is more  
318 palatable). In order to estimate the firing rates of neurons, we aggregated the spikes of each  
319 neuron, on a trial-by-trial basis, in 250ms bins moved by 25ms steps. We divided the aggregate  
320 number of spikes by the width of the bins (250ms) to obtain the near-instantaneous firing rate  
321 of each neuron across time on individual trials.

322 These firing rates, of course, vary widely between neurons. Furthermore, correlations be-  
323 tween firing rate and palatability ranks may be significantly positive or significantly negative.  
324 We therefore needed to perform a 2-stage transform on neural firing before we could analyze  
325 all neurons as a group in our regression analysis. The first step was standardization - we trans-  
326 formed the firing rate of each neuron in each time bin by subtracting the trial-averaged firing  
327 rate of the neuron in that time bin and scaling by its standard deviation across trials (to get  
328 z-scores), ensuring that the firing rates of all neurons were on a comparable scale. Next, we  
329 multiplied the standardized firing rate of each neuron by the sign of the time-averaged Spear-  
330 man correlation coefficient between its firing and the palatability ranks. This ensured that the  
331 sign of the relationship of neural firing with palatability was the same for all neurons in our

332 dataset, but left the magnitude of that relationship unaffected.

333 Our statistical model treats the standardized firing rate  $firing_{t,P,i}$  of a neuron at time  
334 bin  $t$  on trial  $i$  of a taste with palatability rank  $P$  as Gaussian-distributed with a mean  $\mu_{t,P}$   
335 that depends linearly on  $P$ . We defined the palatability index in time bin  $t$ ,  $\beta_{Palatability,t}$ , as  
336 the change in  $\mu_{t,P}$  induced by a unit change in  $P$ .  $\beta_{Palatability,t}$  is, therefore, the slope of the  
337 line that explains  $\mu_{t,P}$  in terms of  $P$ , an estimate of the strength of the firing-palatability  
338 relationship. Using weakly informative Gaussian and Half-Cauchy priors for the mean and  
339 variance parameters respectively, our model formally says:

$$\begin{aligned} \text{Prior on palatability index: } & \beta_{Palatability,t} \sim \mathcal{N}(0, 1) \\ \text{Prior on observation noise: } & \sigma \sim \text{HalfCauchy}(1) \\ \text{Mean firing rate: } & \mu_{t,P} = \beta_{Palatability,t} \times P \\ \text{Firing rate: } & firing_{t,P,i} \sim \mathcal{N}(\mu_{t,P}, \sigma) \end{aligned} \tag{2}$$

340 We used MCMC to infer the posterior distribution of  $\beta_{Palatability,t}$  across all neurons in our  
341 dataset (again, see above). The firing rate transformations defined previously put the activity of  
342 all neurons on the same scale and allowed us to infer a single posterior distribution of  $\beta_{Palatability,t}$   
343 across all the neurons in our dataset. We repeated this regression for each time bin  $t$  from 0.25s  
344 before to 1.5s after taste delivery, obtaining posterior estimates of  $\beta_{Palatability,t}$  specific to each  
345 time bin. Finally, we normalized  $\beta_{Palatability,t}$  by subtracting its average baseline value (from  
346 0.25 to 0s before tastes). We report the baseline-normalized  $\beta_{Palatability,t}$  as the palatability  
347 index  $\beta_{Palatability}$ .

#### 348 2.2.4 Characterizing the time course of the palatability index

349 In a manner similar to our previous work (Sadacca et al. (2016)), we modeled the time course  
350 of the posterior mean of the single neuron palatability firing index,  $\bar{\beta}_{Palatability}$ , with a logistic  
351 sigmoid. The difference between the lower and upper asymptotes of the S-shaped logistic  
352 function fits the total rise in  $\bar{\beta}_{Palatability}$  across time, while its slope describes the rate of this  
353 rise. As  $\beta_{Palatability}$  was already normalized to its average pre-stimulus value, we set the lower  
354 asymptote of the logistic function to 0. With weakly informative Gaussian priors (restricted to  
355 positive values) on the upper asymptote ( $L$ ), slope ( $k$ ) and inflection time ( $t_0$ , ms post taste  
356 delivery) of the logistic sigmoid, our model is as follows:

$$\begin{aligned}
 \text{Prior on upper asymptote: } L &\sim \begin{cases} \mathcal{N}(0, 0.1) & L > 0 \\ 0 & \text{otherwise} \end{cases} \\
 \text{Prior on slope: } k &\sim \begin{cases} \mathcal{N}(1, 1.0) & k > 0 \\ 0 & \text{otherwise} \end{cases} \\
 \text{Prior on inflection time: } t_0 &\sim \begin{cases} \mathcal{N}(675\text{ms}, 75\text{ms}) & t_0 > 0 \\ 0 & \text{otherwise} \end{cases} \\
 \text{Prior on observation noise: } \sigma &\sim \text{HalfCauchy}(1) \\
 \text{Mean palatability index: } \bar{\beta}_{\text{Palatability}}(t) &\sim \mathcal{N}\left(\frac{L}{1 + e^{-k(t-t_0)}}, \sigma\right)
 \end{aligned} \tag{3}$$

357 We defined the peak of the palatability firing index,  $t_{\text{peak}}$ , as the time (post taste deliv-  
 358 ery) when  $\bar{\beta}_{\text{Palatability}}$  reached 95% of its maximum value,  $L$ . We transformed the posterior  
 359 distributions of  $L$ ,  $k$  and  $t_0$  to get  $t_{\text{peak}}$  (inferred using MCMC) as follows:

$$t_{\text{peak}} = \frac{\ln \frac{95}{5}}{k} + t_0 = \frac{\ln 19}{k} + t_0 \tag{4}$$

### 360 2.2.5 Modeling and change-point identification in ensemble firing data

361 As described in the Introduction (and Discussion), previous analyses reveal that rat GC pop-  
 362 ulation activity in response to a taste consists of a sequence of 3 coherent, abruptly-appearing  
 363 ensemble states (Katz et al. (2001), Jones et al. (2007), Sadacca et al. (2012), Sadacca et al.  
 364 (2016), Li et al. (2016)) in which firing rates “code”, in turn, taste presence, taste identity,  
 365 and taste palatability; the transition into this last state has particular relevance for the pre-  
 366 diction of palatability-related behavior in single trials, and is the subject of this study. While  
 367 identifying these sequences typically requires several forward and backward passes through a  
 368 dataset made up of many identical (i.e., unperturbed) trials, the work already published on  
 369 the nature of these state sequences (see also Jones et al. (2007) and Moran and Katz (2014))  
 370 renders it possible (for the purposes of the current study) to more concretely define this process  
 371 as involving ensemble firing change points between states having the following properties (also  
 372 see Figure 6):

- 373 1. **Detection state:** a single distribution of population activity for all the tastes, indicating  
 374 taste presence on the tongue.
- 375 2. **Identity state:** 2 distinct distributions of population activity, for the 2 taste identities  
 376 in our experiments (Suc and Qui).
- 377 3. **Palatability state:** 4 distinct distributions of population activity, for the 4 taste palata-  
 378 bilities in our experiments (Dil Suc, Conc Suc, Dil Qui and Conc Qui).

379 With this characterization we were able to design a relatively simple change-point model  
 380 that allowed us to detect these coherent transitions in population activity in individual trials.

381 We first prepared the data for the change-point model by aggregating the spikes of each neuron  
382 in each trial into 10ms non-overlapping bins, indexing each neuron recorded in a session with  
383 a scalar  $i$  running from 0 to the number of neurons in the session  $N$ . We then converted the  
384 aggregate spiking data to a categorical format by marking each time bin by the index  $S$  of the  
385 neuron that spiked in that bin, with  $S = 0$  corresponding to no spikes from any neuron. If more  
386 than one neuron spiked in a time bin - a highly uncommon occurrence, given the relatively low  
387 firing rates of GC neurons and the small (10 ms) bins being used - we randomly selected one  
388 of the spiking neurons for assignment to that bin (Jones et al. (2007); Sadacca et al. (2016)).

389 With the (processed) categorical spiking data in hand, we now designed the change-point  
390 model to describe the ensemble firing in each of the 3 states (listed above) as categorical  
391 distributions with  $N + 1$  emissions, with 1, 2 and 4 such distributions corresponding to the  
392 detection, identity and palatability states respectively. Note that the results of this analysis  
393 are unchanged if we relax the parameters slightly to allow for 4 “state 2” distributions—that is,  
394 if we allow the Identity State to differ for the different concentrations of Sucrose and Quinine;  
395 this is probably because while many neurons may code different NaCl concentrations distinctly  
396 (Sadacca et al. (2012)), for other tastes the vast majority of neurons appear to code quality  
397 rather than concentration (see, for instance, Fonseca et al. (2018)).

398 We analyzed 1.5s of ensemble activity post taste delivery from each of the 4 optogenetic  
399 conditions in the 0.5s perturbation sessions. For the control (laser off) trials, this corresponded  
400 to 0-1.5s of firing after taste delivery. On the perturbed trials, we ignored the 0.5s of activity  
401 when the lasers were on - for example, we analyzed 0.5-2.0s of firing post tastes when the  
402 lasers were on from 0-0.5s. In the resultant 1.5s of activity, we assumed that the change from  
403 detection to the identity state,  $C_I$ , happens anywhere in the interval  $[0.2s, 0.6s]$  (except the 0-  
404 0.5s perturbation trials, where we allowed the identity state to start earlier from 0.1s, to account  
405 for the possibility that some amount of taste processing happens in GC even while the neurons  
406 are being perturbed). The second change-point,  $C_P$ , from identity to palatability firing, was  
407 assumed to occur anywhere in the interval  $[C_I + 0.2s, 1.3s]$  (except the 0.7-1.2s perturbation  
408 trials, where the palatability state can start earlier at  $C_I + 0.1s$  for the same reason). This is  
409 equivalent to placing uniform priors over the intervals that define  $C_I$  and  $C_P$ , corresponding  
410 to the timing of sudden, coherent firing rate transitions in GC ensembles (Jones et al. (2007),  
411 Sadacca et al. (2016)).

412  $C_I$  and  $C_P$  are therefore latent variables of the change-point model that control the proba-  
413 bilities of the emissions actually observed. The Expectation-Maximization (EM) algorithm is  
414 the most widely used approach to perform inference in such models with latent variables; for  
415 stability and speed issues, we used a “hard-assignment” version of EM to fit the change-point  
416 model (Bishop (2016)). Starting with a randomly chosen set of initial emission probabilities  
417  $\alpha_D$ ,  $\alpha_I$  and  $\alpha_P$  for the categorical emissions that define the detection, identity and palatability  
418 states respectively, the EM algorithm for our change-point model repeatedly cycled between 2  
419 steps:

420 1. **“Hard” E-step:** Pick the combination of the latent variables,  $C_I$  and  $C_P$ , that has

421 maximum posterior probability given the observed categorical spikes  $S$  and the ensemble  
422 firing probabilities  $\alpha_D$ ,  $\alpha_I$  and  $\alpha_P$ . We directly pick the mode of the joint posterior  
423 distribution of  $C_I$  and  $C_P$  in our hard-assignment version of the E-step instead of taking  
424 their expectations/means.

425 2. **M-step:** Set the categorical firing probabilities for each state to values that maximize the  
426 likelihood of the data given the  $(C_I, C_P)$  pair picked in the E-step. This is proportional  
427 to the number of emissions of each neuron in that state. For example, with  $S_t$  as the  
428 emission observed at time  $t$ , the likelihood-maximizing emission probabilities of neuron  
429  $n$  can be calculated as:

$$\begin{aligned} \text{In detection state: } \alpha_{D,n} &= \frac{\sum_{t=1}^{C_I} \mathbf{1}(S_t = n)}{\sum_{n=1}^N \sum_{t=1}^{C_I} \mathbf{1}(S_t = n)} \\ \text{In identity state: } \alpha_{I,n} &= \frac{\sum_{t=C_I}^{C_P} \mathbf{1}(S_t = n)}{\sum_{n=1}^N \sum_{t=C_I}^{C_P} \mathbf{1}(S_t = n)} \\ \text{In palatability state: } \alpha_{P,n} &= \frac{\sum_{t=C_P}^{1.5s} \mathbf{1}(S_t = n)}{\sum_{n=1}^N \sum_{t=C_P}^{1.5s} \mathbf{1}(S_t = n)} \end{aligned} \quad (5)$$

430 where  $\mathbf{1}$  is the unit function that is 1 when  $S_t = n$  and 0 otherwise.

431 In order to deal with the possibility that EM can get stuck at sub-optimal local maxima of log  
432 likelihood, we ran the algorithm from 100 different random initializations of the  $\alpha$  parameters.  
433 We monitored the log likelihood of the data given the model parameters and ran the algorithm  
434 to a convergence threshold of  $10^{-8}$  (or a maximum of 300 iterations). Finally, we picked the  
435 run with the maximum log likelihood at convergence and reported the change-points (and their  
436 posterior probabilities given  $S$  and  $\alpha$ ) found on this run.

437 It is worth noting that an inevitable result of performing such analyses on discontinuous  
438 data - such as trials in which 0.5s of spiking is missing because of optogenetic inactivation - is a  
439 certain number of artifactual change-points identified around the start or end of the inactivation  
440 time (the alternative is artifactually few change-points identified). This issue is handled in the  
441 Results and Discussion sections.

## 442 2.2.6 Measuring aversive orofacial behaviors (gapes)

443 Bitter (e.g., Quinine) tastes cause rats to produce an orofacial behavior known as “gaping”, the  
444 purpose of which is to maneuver the offending substances to the front of the mouth for egestion.  
445 As such, gapes index the fact that the neural processing of the bitter taste has (in a certain  
446 sense) reached completion - the rat has “decided” that it does not want to ingest the taste. The

447 occurrence of gapes can be measured in a number of ways, the most common of which is *via*  
448 human coding of video recordings - in the best of circumstances, gapes are readily visible as  
449 large yawn-like movements.

450 Of course, the best of circumstances often fail to occur in rats free to move and rear.  
451 This fact, and the difficulty of getting precise measures of gape onset time from a visual record,  
452 renders video coding of gapes suboptimal for our purposes. Much more objective and less noise-  
453 ridden is evaluation of jaw electromyography (EMG), in which individual gapes are recognizable  
454 as particularly large-amplitude and large-duration electrical bursts (Figure 4A1-A2). We have  
455 previously built a quadratic classifier to detect these bursts in ongoing anterior digastric EMG  
456 signals, achieving 75% accuracy (Li et al. (2016)).

457 Even this approach has somewhat troubling limitations, however, as its failure to reach  
458 close to 100% accuracy indicates. These limitations stem from the facts that: 1) not all high-  
459 amplitude jaw movements are gapes; and 2) gapes vary widely in amplitude, and in fact some  
460 are small enough to appear similar in size to many other mouth movements (see Figure 4A1-  
461 A2). In practice, both types of variability leave the classifier subject to false positives that  
462 must be somehow recognized and removed - the former most notably at the beginning of trials  
463 (when the taste hits the tongue, causing 1-2 relatively large-amplitude licks).

464 One solution to these problems involves making simultaneous recordings from multiple jaw  
465 muscles, but pilot experiments left us concerned that such drastic infiltration of the jaw can  
466 compromise normal movement, which would make interpreting our results difficult. Instead, we  
467 decided to take advantage of another, more robust feature of gaping: the fact that gapes occur  
468 in 4-6 Hz “bouts” of anterior digastric activity (Travers and Norgren (1986), Li et al. (2016)).  
469 While identifying gaping bouts as time periods during which this rhythmicity dominates the  
470 EMG signal is also imperfect - it is probabilistic and involves smoothing across time - it largely  
471 solves the problems described above.

472 We instantiated just such a procedure here, applying a Bayesian spectrum analysis that  
473 estimates the posterior probability that a 4-6Hz rhythm underlies a short time series of EMG  
474 activity (see below for technical details). By this analysis, the probability of gaping to any  
475 taste is modestly elevated at trial onset (because of the initial large-amplitude licks), but it  
476 quickly drops to effectively zero for Sucrose, which therefore contributes nothing to the overall  
477 calculation of when gaping begins. On Quinine trials, in contrast, the probability waxes and  
478 wanes appropriately with the occurrence of gape bouts (Figure 4B1-B2), rising precipitously  
479 and reliably just prior to the first gape (detected in a subset of data with both video recordings  
480 and the quadratic classifier, Figure 4D).

481 In important ways, this analysis is analogous to the method of divining palatability-relatedness  
482 of single-neuron firing described above and used in many previous studies (Fontanini and Katz  
483 (2006), Sadacca et al. (2012), Li et al. (2013), Sadacca et al. (2016), Li et al. (2016)) - the elec-  
484 trophysiological signal (in this case, the posterior probability of the range of gaping frequency in  
485 the EMG signal) varies (i.e., correlates) with the palatability of the proffered taste, and we aver-  
486 age these correlations to ascertain the palatability-relatedness of the signal at each time point.

487 Sucrose contributes no information to this signal (because rats do not gape to these sucrose  
488 concentrations), so the overall average gaping latency is equivalent to the difference between the  
489 time distributions of gaping probability to Dil and Conc Qui (see [Grill and Norgren \(1978a\)](#),  
490 [Travers and Norgren \(1986\)](#)), which can be statistically assessed as the Kullback-Leibler (KL)  
491 divergence (again, see technical details below). Not only does this procedure reveal the onset  
492 of orofacial behaviors reflecting aversion, it pits the two Qui concentrations against each other  
493 to get rid of most of the nonspecific gape-like EMG activity (mentioned above) which is of  
494 similar magnitude on both Dil and Conc Qui trials and does not contribute to the gape onset  
495 calculation.

496 Unlike previously used methods, in which (usually) trials where gapes could not be reliably  
497 detected were removed from further analysis, this algorithm combines EMG data from all the  
498 trials available, thereby allowing us to avoid making statistical comparisons between conditions  
499 with very different sample sizes. At the cost of being unable to precisely detect the specific  
500 timing of later gapes in a bout, this procedure provides an estimate of the average timing of  
501 the first gape (both robust and reliable enough for the purposes of the within-session, between-  
502 condition analyses performed here).

503 **Bayesian spectrum analysis (BSA) of EMG recordings:** As detailed previously, we  
504 recorded voltage signals from 2 unipolar EMG electrodes implanted in the anterior digastric  
505 muscle at 30kSamples/s. We used the difference in the voltage recorded by the 2 electrodes as  
506 the EMG signal - this procedure helps to cancel out any large artifacts produced by the animal's  
507 movements and is equivalent to using a differential amplifier (as done in [Li et al. \(2016\)](#)). We  
508 down-sampled the EMG signal to 1000Hz by averaging the voltage values in sets of 30, and  
509 highpass filtered the down-sampled signal above 300Hz ([Travers and Norgren \(1986\)](#); [Li et al.](#)  
510 [\(2016\)](#)) using a 2<sup>nd</sup> order Butterworth filter. The absolute value/magnitude of the filtered  
511 EMG signal was then lowpass filtered (again using a Butterworth filter of order 2) below 15Hz,  
512 effectively capturing the envelope of variation of the EMG signal (plotted as the black curve  
513 in [Figure 4A1-A2](#)). This cutoff of 15Hz is sufficient for identifying orofacial behaviors, all of  
514 which occur at frequencies smaller than 10Hz ([Grill and Norgren \(1978a\)](#); [Li et al. \(2016\)](#)).

515 We subjected the envelope of the EMG signal to Bayesian spectrum analysis (BSA). BSA  
516 involves the construction of a probabilistic model of the generation of periodic signals from  
517 the superposition of sinusoids of different frequencies. We divided the signal on each trial  
518 into bins of width 300ms, with a step size of 1ms. We assumed that the EMG signal in each  
519 bin is produced by a sinusoid of a single frequency (plus noise) - in a probabilistic setting,  
520 this assumption implies the same model as a discrete-time Fourier transform. Contrary to  
521 the Fourier transform, however, BSA infers the posterior distribution of frequencies given the  
522 data. BSA has been shown to provide posterior estimates of frequencies that are an order of  
523 magnitude more precise than the Fourier transform ([Bretthorst \(2013\)](#); [Granqvist et al. \(2011\)](#)).  
524 We used the BaSAR R package for BSA ([Granqvist et al. \(2012\)](#)) and calculated the posterior  
525 probabilities of frequencies from 1Hz to 10Hz in 20 steps for each 300ms wide bin of data.



526 **Identifying the mean onset of aversive orofacial behavior:** Rats respond to intra-oral  
527 deliveries of Qui in the concentration range used in our experiments ( $10^{-4}$  to  $10^{-3}$ M) with  
528 an initial set of non-specific investigative licks that are followed by large, jaw-opening mouth  
529 movements called gapes (Grill and Norgren (1978a), Figure 4A1-A2). Gapes primarily involve  
530 activity of the anterior digastric muscle at 4-6Hz (Grill and Norgren (1978a), Li et al. (2016))  
531 - we, therefore, used the probability of movements at 4-6Hz in the digastric EMG signal (from  
532 BSA, see previous section) as the probability of gaping ( $\text{Pr}_{\text{Gape}}$ ). This spectral measure of  
533  $\text{Pr}_{\text{Gape}}$  has a strong correspondence with a previously-defined and above-discussed quadratic  
534 classifier (that tags individual mouth movements as gapes (Li et al. (2016))). On individual Qui  
535 trials (Figure 4B1-B2),  $\text{Pr}_{\text{Gape}}$  from BSA is high (close to 1.0) when the quadratic classifier tags  
536 mouth movements as gapes. In addition, the average probability of gaping ( $\overline{\text{Pr}}_{\text{Gape}}$ ) from BSA  
537 (Figure 4C1-C2) is very similar to an across-trial, peri-stimulus average of the gapes picked  
538 by the quadratic classifier. In contrast to the quadratic classifier, however, the BSA measure  
539 of  $\text{Pr}_{\text{Gape}}$  is based entirely on the spectral content of the EMG signal. It, therefore, does not  
540 require the construction of a sufficiently complex classifier function (with a large enough set of  
541 experimenter-tagged examples to train the classifier) to pick out individual gapes. This also  
542 ensures that BSA considers bouts of movements together while calculating  $\text{Pr}_{\text{Gape}}$ , making it  
543 robust against isolated large amplitude movements early in the animal's orofacial response.  
544 These initial movements were often found to be large licks on video and limited the accuracy  
545 of the quadratic classifier in Li et al. (2016) to 75%.

546 The probability of the transition from the rats' initial investigative licks to gapes depends  
547 on the concentration of Qui delivered:  $10^{-3}$ M (Conc Qui) elicits gapes on more than twice the  
548 number of trials as  $10^{-4}$ M (Dil Qui) (Grill and Norgren (1978a), Li et al. (2016)). Comparison  
549 of  $\text{Pr}_{\text{Gape}}$  on Dil and Conc Qui trials, thus, provides a natural way to calculate the mean onset of  
550 gaping across all the Qui trials in an experimental condition (again, Suc trials add little to this  
551 analysis, as the probability of 4-6Hz activity drops to 0 within 100-200msec of taste delivery).  
552 We expect the distribution of  $\text{Pr}_{\text{Gape}}$  on Dil Qui trials to be similar to that on Conc Qui trials  
553 in the investigative licking phase. Once gaping starts, however, we expect a large difference in  
554 the distributions of  $\text{Pr}_{\text{Gape}}$  on Dil and Conc Qui trials.  $\text{Pr}_{\text{Gape}}$  on Dil Qui trials, therefore, acts  
555 like a baseline for  $\text{Pr}_{\text{Gape}}$  on Conc Qui trials: we conclude that gapes have started only when  
556  $\text{Pr}_{\text{Gape}}$  of Conc Qui begins to differ significantly from this baseline.

557 We used Beta distributions to describe  $\text{Pr}_{\text{Gape}}$  on Dil and Conc Qui trials. The Beta dis-  
558 tribution is commonly used to model the probability parameter of a Bernoulli (1/0) process<sup>2</sup>.  
559 Gaping being a Bernoulli process, the Beta distribution is an appropriate choice for model-  
560 ing  $\text{Pr}_{\text{Gape}}$ . We defined one such Beta distribution in each time bin for Dil and Conc Qui  
561 separately, parametrized by the number of trials where the animal was gaping ( $\text{Pr}_{\text{Gape}} >$   
562  $0.5$ ) or not ( $\text{Pr}_{\text{Gape}} < 0.5$ ). The Kullback-Leibler divergence of these Beta distributions  
563 ( $D_{\text{KL}}(\text{Conc Qui}||\text{Dil Qui})$ )<sup>3</sup> provides a natural way to quantify the difference between  $\text{Pr}_{\text{Gape}}$  on

---

<sup>2</sup>The Beta distribution for the parameter  $p$  of a Bernoulli process is expressed in terms of its concentration parameters,  $\alpha$  and  $\beta$ .  $\alpha$  = observed number of 1s and  $\beta$  = observed number of 0s.

<sup>3</sup>The KL divergence between two Beta distributions with concentration parameters  $(\alpha_1, \beta_1)$  and  $(\alpha_2, \beta_2)$  can

564 Dil and Conc Qui trials and shows a sharp jump  $\sim 1$ s post taste delivery (Figure 4E), consistent  
565 with the timing of the transition from investigative licks to gapes (Grill and Norgren (1978a),  
566 Travers and Norgren (1986), Li et al. (2016)). Finally, we calculated the cumulative sum of  
567  $D_{KL}(\text{Conc Qui}||\text{Dil Qui})$  across time: the jump corresponding to the mean onset of gaping is  
568 expressed as a change in slope of the cumulative sum. We fit two straight lines to the cumu-  
569 lative sum to capture this change in slope: the intersection of the two lines defines the mean  
570 timing of the onset of gaping (Figure 4F).

---

be written as:  $D_{KL} = \log \Gamma(\sum_{j=1}^{j=2} \alpha_j) - \sum_{j=1}^{j=2} \log \Gamma(\alpha_j) - \log \Gamma(\sum_{j=1}^{j=2} \beta_j) + \sum_{j=1}^{j=2} \log \Gamma(\beta_j) + \sum_{j=1}^{j=2} (\alpha_j - \beta_j) (\psi(\alpha_j) - \psi(\sum_{j=1}^{j=2} \alpha_j))$ ,  
where  $\Gamma$  and  $\psi$  are the gamma and digamma functions respectively.

## 571 3 Results

### 572 3.1 Experimental paradigm and data overview

573 **Figure 1A** depicts the preparation used for our experiments - IOCs for taste delivery, bilateral GC  
574 opto-trodes for recording of neural ensemble activity and delivery of laser light, and EMG elec-  
575 trodes in the anterior digastric (jaw) muscle for simultaneous assaying of consumption-related  
576 mouth movements. Four weeks prior to the surgery in which we installed these assemblies,  
577 we injected AAV carrying the optogenetic silencer ArchT (along with green fluorescent protein  
578 - GFP) into GC. The GFP allowed us to confirm (post-mortem) infection of GC neurons by  
579 immunohistochemical verification of the GFP tag (**Figure 1B**).

580 The rats received intra-oral deliveries of 30mM sucrose (Dil Suc), 300mM sucrose (Conc  
581 Suc), 0.1mM Quinine-HCl (Dil Qui) and 1mM Quinine-HCl (Conc Qui). One set of sessions  
582 involved “brief perturbation” trials: on 75% of the trials in these sessions, we inhibited GC  
583 neurons for 0.5s, beginning either at 0s, 0.7s or 1.4s post taste delivery (**Figure 1C**). These three  
584 perturbation windows tile the period containing the temporal epochs that characterize GC taste  
585 responses (**Katz et al. (2001)**, **Sadacca et al. (2012)**, **Sadacca et al. (2016)**). More specifically, the  
586 earliest (0-0.5s) and latest (1.4-1.9s) inhibitions affect GC neurons before and after the range of  
587 likely transition times into the behaviorally-relevant state containing palatability-related firing,  
588 which typically occur just before, during, or just after the middle (0.7-1.2s) perturbations  
589 (**Figure 1C**, also see **Figure 1D** for a basic schematic of coding across the first 2.0s of GC taste  
590 responses). In a separate set of experimental sessions (performed using a subset of the same  
591 rats), we inhibited GC across the entire duration of the taste responses (0-2.5s post stimulus)  
592 (**Figure 1C**) as a control comparison for the brief 0.5s perturbations.

593 We recorded the activity of 244 GC single neurons across 10 sessions ( $24.4 \pm 13$  units/session)  
594 of 0.5s inhibition, and of an additional 73 GC single neurons in 5 sessions ( $14.6 \pm 4.7$  units/session)  
595 of 2.5s inhibition. The two types of experimental sessions were counterbalanced, such that 3 rats  
596 received 2.5s inhibition sessions first, and 2 received 0.5s inhibition sessions first. No differences  
597 with order were noted.

598 The AAV-ArchT construct used in this study has been shown to infect neurons of multi-  
599 ple types (e.g., pyramidal neurons and interneurons) in an unbiased manner (**Aschauer et al.**  
600 **(2013)**). Our optogenetic inhibition protocol, therefore, can be thought of as a general per-  
601 turbation of the dynamics of GC neurons in response to tastes. Note as well that any such  
602 perturbation (including of individual neuron types) would be expected (perhaps paradoxically)  
603 to enhance the firing of some neurons through network-level effects (like disinhibition, *via* sup-  
604 pression of the firing of inhibitory neurons, **Allen et al. (2015)**). This expectation was borne  
605 out in the data: the firing of most of the recorded GC units (146/244, 60%, example unit in  
606 **Figure 2A1-A4**) was significantly suppressed when the laser was switched on for 0.5s, but the  
607 firing of an additional 20% (49/244) was significantly enhanced.

608 The same pattern of results was observed when the duration of optogenetic inactivation  
609 was increased to 2.5s: the firing of 82% of GC neurons (60/73, example unit in **Figure 2B1-**

610 B2) was inhibited, and the activity of 15% (11/73) was enhanced. The fact that 2.5s of laser  
611 stimulation appeared to inhibit a larger percentage of neurons is likely an artifact of analysis  
612 methods: suppression of the low firing-rates (3-10Hz) that dominate GC taste responses (Katz  
613 et al. (2001), Jones et al. (2007), Samuelsen et al. (2012), Kusumoto-Yoshida et al. (2015),  
614 Mazzucato et al. (2015)) can be difficult to detect, particularly in short time windows; consistent  
615 with this, we observed that the highest likelihood of detecting suppression in 0.5s perturbation  
616 sessions occurred when that perturbation was delivered in the middle of taste processing (0.7-  
617 1.2s, Figure 2C) - at the time of peak firing rate modulations. With 2.5s of inactivation, which  
618 covered the entirety of GC taste responses, we naturally had the power to detect suppression  
619 in a larger fraction of neurons (Figure 2D).

620 Although this specific optogenetic protocol cannot be used to answer cell-type/microcircuit-  
621 specific questions, its network-wide effects are ideal for testing the macroscopic dynamical  
622 properties of taste processing in GC (the purpose of the current work): GC taste responses  
623 evolve through a sequence of temporal epochs (Katz et al. (2001), Maffei et al. (2012), Jezzini  
624 et al. (2013)) which have the hallmarks of emergent, quasi-stable states of a system that can be  
625 speculatively described, at a high level, as an attractor network (Jones et al. (2007), Miller and  
626 Katz (2010), Mazzucato et al. (2015), Sadacca et al. (2016)); our optogenetic protocol brings  
627 about a strong perturbation of the network activity characterizing these stable states, and by  
628 mapping the state dependence of the effects of these perturbations, we are able to directly test  
629 the proposed function of these states (and of the transitions between them).

### 630 **3.2 Early perturbations delay single-neuron palatability-related re-** 631 **sponses while late perturbations do not**

632 We first assessed the impact of optogenetic perturbation on neural activity - that is, on the  
633 palatability-related content of GC taste responses that had been smoothed (using 250ms-wide  
634 windows moved in 25ms steps) and standardized to be on a uniform scale (see Materials and  
635 Methods for details). The set of responses (1 per taste) were regressed against the palatability  
636 ranks of the taste stimuli (Conc Suc:4, Dil Suc:3, Dil Qui:2, Conc Qui:1) to obtain a palatability  
637 index,  $\beta_{Palatability}$ . Being a Bayesian analysis (consult Materials and Methods for details on  
638 model setup and inference), this regression gives access to the entire posterior distribution of  
639  $\beta_{Palatability}$  at every time point. Knowing the spread of the posterior distribution of  $\beta_{Palatability}$   
640 at every time point allows us to more simply perform significance tests: we can conclude that  
641  $\beta_{Palatability}$  is different from 0 at the 5% level of significance if the 95% extent of its posterior  
642 distribution (generally known in Bayesian analyses as the “credible interval”) does not overlap  
643 0 (such time points are marked by dots in Figure 3A). We used logistic sigmoid functions to  
644 better characterize the time evolution of the posterior mean of  $\beta_{Palatability}$  (shown with dashed  
645 lines in Figure 3A), and defined the size and latency (time to attain 95% of maximum size) of  
646 the upper asymptote of the logistic fit as the magnitude and latency of the peak of  $\beta_{Palatability}$   
647 respectively.

648 As expected, perturbation for 2.5s had a devastating impact on palatability-related re-

649 sponses of neurons in the affected GC network (Figure 3A). In control (laser-off) trials, as  
650 in previous studies (Sadacca et al. (2016)),  $\beta_{Palatability}$  climbed to an asymptote  $\sim 0.8s$  after  
651 taste delivery. However, on trials where the lasers were switched on at the time of taste de-  
652 livery and left on for 2.5s,  $\beta_{Palatability}$  never rose significantly from 0. Note that the latency to  
653 peak palatability firing is comparable in the two conditions (blue bars in Figure 3B), but that  
654 the magnitude of the peak is close to 0 when GC neurons are being perturbed (red bars in  
655 Figure 3B).

656 The impact of brief (0.5s) perturbations on the palatability content of single-neuron GC  
657 taste responses was smaller in magnitude, but could be quite dramatic with regard to peak  
658 timing, depending on when the perturbation occurred (Figure 3C). In these sessions, just as  
659 in the 2.5s perturbation sessions,  $\beta_{Palatability}$  peaked  $\sim 0.8s$  after taste delivery when the lasers  
660 were left off. Furthermore, neither the timing nor magnitude of this peak was significantly  
661 affected by perturbation of GC neurons in the later part of the taste response (1.4-1.9s, after  
662 palatability-related firing had emerged).

663 In contrast, if activity was perturbed for the first 0.5s of the GC taste response, the palatabil-  
664 ity content of this response did not reach asymptote until  $\sim 1.3s$ , a lag of almost 0.5s compared  
665 to the control condition (laser-off trials). Note that the failure of GC firing to “bounce back”  
666 immediately after laser-off (which occurred 300-400ms before the time of peak palatability con-  
667 tent in control trials) implicates GC in the processing of palatability itself (see Discussion).  
668 Note as well that despite delaying the peak of  $\beta_{Palatability}$ , the early perturbation did not affect  
669 its later emergence - if anything, the magnitude of the peak was larger in this condition (red  
670 bars in Figure 3C). The 0-0.5s perturbation thus appears to produce a transient shift out of  
671 the attractor dynamics responsible for GC taste responses followed by gradual relaxation back  
672 into the stable state after the end of the perturbation; variability in this process (which can  
673 overshoot the stable point, depending on the speed of relaxation) could explain the apparent  
674 increase in the magnitude of the peak palatability index in this condition.

675 Finally, 0.5s perturbations delivered in the middle of the taste response (0.7-1.2s) also had  
676 a powerful impact on GC palatability-related firing: the magnitude of the peak of  $\beta_{Palatability}$   
677 was significantly lower in this condition (red bars in Figure 3C); the latency of this peak,  
678 meanwhile, was (like that produced by earlier perturbations) about 0.5s later than no-laser  
679 trials. The former effect was unsurprising, as this particular perturbation overlaps the heart of  
680 palatability-related activity in GC neurons (Katz et al. (2001), Jezzini et al. (2013), Sadacca  
681 et al. (2016)).

### 682 3.3 GC perturbation delays the onset of aversive orofacial behavior

683 We monitored our rats' mouth movements *via* electromyography (EMG). Specifically, we im-  
684 planted EMG electrodes in the anterior digastric muscle; as a jaw moving muscle, the anterior  
685 digastric plays a major role in the production of “gapes”, the rhythmic orofacial behavior that  
686 serves to move aversive tastants to the front of the mouth in preparation for expelling. Far less  
687 accessible tongue muscles underlie mouth movements that support behaviors (such as “lateral

688 tongue protrusions”) that help the rat prepare to ingest appetitive tastants (Grill and Norgren  
689 (1978a), Travers and Norgren (1986), Li et al. (2016)). For that reason, we focus solely on  
690 gapes in this study (but see Discussion).

691 Individual mouth movements can be recognized as bursts of anterior digastric EMG activity  
692 (Figure 4A1-A2). However, the variability in the amplitudes and durations of these EMG bursts  
693 reduces our ability to separate gapes from other large mouth movements. We, therefore, made  
694 use of a more robustly distinctive feature of gaping – the fact that gapes occur in 4-6Hz bouts  
695 (Travers and Norgren (1986), Li et al. (2016)). We analyzed the spectral content of the envelope  
696 of the EMG signal using Bayesian spectrum analysis (BSA; see Materials and Methods for a  
697 detailed discussion) and measured the probability of gaping as the total posterior probability  
698 of 4-6Hz movements.

699 While easier to calculate and less subject to error, this estimate of the probability of gaping  
700 has strong correspondence with gaping bouts identified by a classifier trained on individual  
701 bursts of EMG activity (Li et al. (2016), see Figure 4B1-B2); the trial-averaged probability  
702 of gaping calculated by BSA and more classic techniques are also similar, for both trial types  
703 in which gaping occurred (Dil and Conc Qui trials, Figure 4C1-C2). Finally, the fact that  
704 the probability of gaping jumps precipitously just before the first gape as identified on video  
705 (Figure 4D) confirms this algorithm’s reliability in identifying periods of gaping in the EMG  
706 signal (see Materials and Methods for more details).

707 With this information in hand, we were able to investigate the effects that perturbations  
708 of GC activity have on the animals’ rejection of aversive Qui. On average, gaping begins ~0.9  
709 sec after Qui delivery in control trials – that is, when analysis is restricted to trials in which  
710 the laser was off (trials in which GC neurons were not perturbed, (Figure 5A). This latency is  
711 consonant with that reported in video analysis (Grill and Norgren (1978a)) and classic burst-  
712 oriented analysis of EMG (Travers and Norgren (1986)). Furthermore, this estimate matches  
713 that observed in control rats (published in Sadacca et al. (2016) and Li et al. (2016)) that  
714 received neither laser nor ArchT expression. Thus we can conclude that, at least with regard  
715 to the driving of gaping, our preparation leaves the system capable of normal function.

716 Previous work has shown that while the appearance of palatability-related firing in GC  
717 (which arises suddenly and coherently across neurons in single trials) robustly predicts the  
718 onset of gaping bouts (see below and Sadacca et al. (2016)), it is unrelated to the mechanics  
719 of individual gapes within gaping bouts (Grill and Norgren (1978b), Li et al. (2016)). We  
720 therefore predicted that GC perturbations delivered once gaping was already underway would  
721 have minimal impact on gaping behavior.

722 In fact, our data show that rats gaped normally, with gape bouts beginning at approximately  
723 the same time as in control (no laser) trials, if perturbations arrived late in the trial (1.4-1.9s,  
724 Figure 5B). Furthermore, this late perturbation failed to prematurely end gaping bouts that  
725 had already begun. Figures 5C1-C4 show example trials in which the probability of gaping  
726 rhythm in the EMG signal went high following Conc Qui delivery, and stayed high despite late  
727 (1.4-1.9s) GC inhibition. In fact, the percentage of trials in which gaping was maintained into

728 this period was unchanged by late GC perturbation - 57% (36/63) of control trials vs 55%  
729 (26/47) of laser trials. We can thus conclude that GC is of no consequence for the maintenance  
730 of ongoing gaping.

731 In contrast, GC activity plays a clear role in the initiation of gaping. GC perturbations  
732 occurring 0-0.5s after taste delivery - that is, before transitions into the palatability-related  
733 state of GC activity - delayed gaping onset by approximately 0.25s on average (Figure 5B). This  
734 delay cannot be explained in terms of removal of early gaping - gaping latencies as early as 0.5s  
735 after taste delivery were rare, and an analysis of control (no laser) trials showed that removing  
736 latencies of less than 0.5s had essentially no impact on the mean onset time of gaping. The  
737 much more likely explanation is that GC inhibition (which is inevitably partial, see Discussion)  
738 perturbs the ongoing process that leads to the release of a “decision to gape” signal visible in  
739 GC (Sadacca et al. (2016)).

740 Similarly, GC perturbations timed to occur squarely around the average time of the palata-  
741 bility / decision-related neural state change (0.7-1.2s; see Sadacca et al. (2016)) delayed the  
742 onset of gaping until just before 1.2s after taste administration - approximately 0.25s after  
743 gaping on control trials and in control sessions (with no laser or ArchT). That is, brief disrup-  
744 tions of GC activity occurring before or during the “heart” of quinine processing had a strong  
745 impact on the latency of aversive orofacial behavior. Not only is the impact of brief optogenetic  
746 perturbation significant, it was every bit as large as that observed with whole-trial (i.e., 2.5s)  
747 perturbations, which delayed the appearance of gaping by ~0.2s (Figure 5B). These long per-  
748 turbations are not discussed further, because they had the additional unintended consequence  
749 of impacting gaping behavior on control trials (see Figure 5A and Discussion).

### 750 **3.4 GC perturbation impacts orofacial behavior only if delivered be-** 751 **fore the onset of palatability-related ensemble activity**

752 We have previously demonstrated that the temporal dynamics of GC taste responses are well de-  
753 scribed as sudden transitions between two stimulus-specific ensemble firing rate “states” (Jones  
754 et al. (2007)), the latter of which is laden with information about stimulus palatability and  
755 highly predictive of the latency of gaping on single trials (Sadacca et al. (2016)); the trial-  
756 to-trial variability of both behavioral and transition latencies is large (the neural transition  
757 happens at a range of latencies spanning the approximate interval between 0.4 to 1.5s, and the  
758 behavior follows close behind), such that trial averaging smears the changes in firing rates into  
759 a more gradual-seeming ramp.

760 We timed our 0.7-1.2s perturbations to overlap with the transition into this palatability-  
761 related ensemble activity state, but due to the above-described variability in timing, there were  
762 inevitably a subset of trials in which the ensemble state transition occurred before the pertur-  
763 bation. This fact afforded us an opportunity: we predicted that identical 0.7-1.2s perturbations  
764 would impact gaping latency differently depending on whether the transition into the late en-  
765 semble activity state had already occurred in that specific trial; this prediction implies that the  
766 results in Figure 5B, averaged across all trials receiving the perturbation, occlude our ability

767 to see the diversity of that perturbation's possible effects, and mask a larger impact of the  
768 perturbation in one independently identified subset of trials.

769 While we have previously used Hidden Markov Models (HMMs) to detect ensemble firing  
770 rate transitions in GC responses to tastes (Jones et al. (2007), Moran and Katz (2014), Sadacca  
771 et al. (2016)), this analysis is not amenable to the data in our study: a dataset made up of  
772 all 4 trial types (early, middle, and late perturbation, plus control) would be complex enough  
773 (each trial type would likely involve distinct sets of firing rates, see below) that the HMM  
774 would seldom reach stable solutions; divided into individual trial types, meanwhile, the datasets  
775 would be too small to allow convergence to even simple stable fits. Instead, we took advantage  
776 of the insights gained from our previous publications (Katz et al. (2001), Fontanini and Katz  
777 (2006), Jones et al. (2007), Grossman et al. (2008)) and built a constrained change-point model  
778 of GC population activity; specifically, the model consisted of 2 activity change-points, the  
779 latter of which introduced palatability-related firing. This model constrained the general HMM  
780 framework in a way that allowed us to estimate transitions in individual trial types (see Figure 6  
781 and Materials and Methods for details).

782 The distributions of putative transition times (identified by the change-point model) into  
783 the palatability-related ensemble state are shown in Figure 7A for all Qui trials in which GC  
784 firing was perturbed from 0.7s to 1.2s post stimulus. As firing rates were suppressed during  
785 the perturbation, we did not attempt to identify change-points when the lasers were on (a fact  
786 that inevitably impacted change points that could be identified at the "edges" of the excised  
787 time period; see below and Methods). According to this algorithm, the palatability-related  
788 state emerged before the lasers were illuminated on 55% of the trials (92/168, but see below);  
789 on the remaining 45% of trials (76/168), the palatability change-point could not be identified  
790 before laser onset. Regression analysis allowed us to confirm that significant palatability-related  
791 information appeared before 0.7s in trial-averaged single neuron firing during trials in which  
792 the ensemble state transition occurred prior to laser onset time; this information was notably  
793 lacking in trials in which the transition had not occurred (Figure 7B).

794 On the basis of this analysis, we were able to show that, in line with our expectations,  
795 identical 0.7-1.2s perturbations had distinctly different effects on the onset of gaping depending  
796 on whether or not the transition into palatability-relatedness appeared to have occurred prior  
797 to laser perturbation (Figure 7C). Perturbations that arrived before the ensemble transition  
798 delayed gaping by more than  $\sim 0.5$ s - that is, gaping appeared more than 0.2s after the end of  
799 GC inhibition in these trials. A comparison with control data confirmed that this effect was not  
800 caused by a simple truncation of the distribution of gaping latencies: even when we restricted  
801 ourselves to analyzing only the proportion (31%, 52/168) of control trials which lacked any  
802 gaping-related EMG activity till 1.2s (which was, in perturbation trials, the laser off time), the  
803 average gaping latency was still significantly less than that observed in the (larger) subset (45%)  
804 of laser trials in which the ensemble transition failed to precede the 0.7s onset of GC inhibition.  
805 Clearly, GC perturbation perturbs consumption behavior, if that perturbation begins prior to  
806 the ensemble neural transition into palatability coding.



807       Gaping occurred significantly earlier in trials in which the ensemble transition to the high-  
808 palatability state preceded the onset of GC perturbation at 0.7s (Figure 7C), but contrary to  
809 our expectation, gaping was still somewhat delayed compared to the no-laser condition even in  
810 these trials. As the ensemble state transition purportedly happens by 0.7s on these trials (i.e.,  
811 earlier than the average transition time on control trials), we expected that the onset of gaping  
812 would be similarly expedited. This was not the result that we obtained. We considered several  
813 possible explanations for this result (see Discussion), the most reasonable of which seemed the  
814 possibility that some transitions identified as happening just prior to laser onset were artifactual  
815 - the inevitable effect of attempting to identify firing rate changes next to a data “edge” (see  
816 Methods and Discussion) - and thus that for a small subset of trials in this group transitions  
817 into palatability coding did not in fact precede laser onset. Note that this hypothesis would also  
818 explain why the percentage of trials in which pre-0.7s transitions were identified was somewhat  
819 larger than expected (see above, and compare to the grey bars showing transition times in the  
820 no-laser control trials in Figure 7A).

821       We tested this hypothesis, and found that the delay in the onset of gaping can indeed  
822 be entirely attributed to the trials where the ensemble state transition is calculated to occur  
823 between 0.65 and 0.7s. Specifically, when we restricted our analysis to trials in which the  
824 ensemble transition happened at 0.65s or earlier, the onset of gaping was found to occur more  
825 than 300ms earlier than in control trials. We went on to examine the trials in which transitions  
826 were identified to occur between 0.65 and 0.7s, and found that “early-onset” gaping occurred in  
827 only a subset (15) of these trials - almost precisely the same number (14) as there were control  
828 trials in which the transition occurred in the 0.65-0.7s interval; this result suggests that those  
829 true transitions that occurred during this interval likely resulted in gaping that was unaffected  
830 by the laser perturbation.

831       As a whole, our results demonstrate that the impact of brief optogenetic inhibition of GC  
832 depends on precisely when that inhibition occurs: laser perturbation of GC that begins after  
833 the onset of palatability-/decision-related firing utterly fails to impact the timing of aversive  
834 orofacial responses, but GC perturbation that begins before the transition significantly de-  
835 lays those responses. Furthermore, given the trial-to-trial variability in the issuance of this  
836 decision-related transition, the result of any particular timing of brief GC inhibition will differ  
837 in different particular trials, depending on precisely what state the brain has achieved prior to  
838 that perturbation. This result provides support for our overarching hypothesis that the onset  
839 of palatability-related population activity in GC marks a discrete shift in taste processing - the  
840 ensemble transition in taste-related firing that predicts behavior is in fact the emission of the  
841 decision to gape.

## 842 4 Discussion

843 Perception and action are inextricably linked in cortical taste responses. Neurons in gustatory  
844 cortex (GC), the primary sensory cortical area for taste, exhibit responses that, across 1.5s of  
845 post-stimulus time, shift from first reflecting stimulus identity to predicting a rat's consumption  
846 decision (Katz et al. (2001), Fontanini and Katz (2006), Sadacca et al. (2012), Maier and Katz  
847 (2013)). With ensemble analysis, these otherwise gradual-seeming changes in firing rates are  
848 revealed to be swift, coherent transitions between population activity "states" (Jones et al.  
849 (2007)) - transitions that vary widely in latency from trial to trial, and that are therefore  
850 effectively blurred out in stimulus-aligned averages. Despite (in fact, because of) their highly  
851 variable latencies, these ensemble firing states reliably precede the onset of ingestion-egestion  
852 mouth movements by  $\sim 0.2-0.3$ s (Sadacca et al. (2016), Li et al. (2016)), predicting not only  
853 the nature but the latency of these movements in single trials.

854 Here we show that GC neural ensemble dynamics described above are not merely "efferent  
855 copy" reflections of processes occurring elsewhere, but are instead an indication of processing  
856 that is (to at least some extent, see below) intrinsic to GC. Brief (0.5s) optogenetic perturbations  
857 of GC neurons impact the timing of the animal's decision to expel a bitter taste in the mouth,  
858 but only if those perturbations begin before the neural ensemble has shifted to palatability-  
859 related firing. Thus, a unique moment in time (the shift of population activity to reflect stimulus  
860 palatability), despite being enormously variable in latency from trial-to-trial, reflects a tipping  
861 point in taste processing; cortical disruptions have no impact beyond this tipping point, as the  
862 control of the ongoing movements themselves shifts elsewhere (presumably to brainstem pattern  
863 generators that control the ingestion-egestion mouth movements themselves in real time, see  
864 Travers et al. (1997), Travers et al. (2000)).

865 A massively interconnected network of forebrain regions underlies or reflects taste processing  
866 - in addition to GC, this network includes the central and basolateral nuclei of the amygdala  
867 (CeA and BLA, Nishijo et al. (1998), Grossman et al. (2008), Fontanini et al. (2009), Sadacca  
868 et al. (2012)), hippocampus (Ho et al. (2011)), lateral hypothalamus (LH, Yamamoto et al.  
869 (1989), Li et al. (2013)), the bed nucleus of the stria terminalis (BNST, Norgren (1976), Li and  
870 Cho (2006)), the parabrachial nuclei of the pons (Baez-Santiago et al. (2016)), and the nucleus of  
871 the solitary tract (NTS, Di Lorenzo and Lemon (2000)). Several of these brain regions have been  
872 shown to integrate sensory and motor aspects of taste stimuli in their responses (Sadacca et al.  
873 (2016), Baez-Santiago et al. (2016), Denman et al. (2018)). Furthermore, multiple forebrain  
874 regions send direct descending feedback to the primary brainstem taste regions, influencing both  
875 their activity (Di Lorenzo (2000), Cho et al. (2003), Li et al. (2005)) and generation of orofacial  
876 movements (Zhang and Sasamoto (1990), Berridge and Valenstein (1991), Shammah-Lagnado  
877 et al. (1992), Travers et al. (1997)). Given this widely distributed network of processing nodes,  
878 it is to be expected that perturbation (or disruption over long periods of time) of one (or a few)  
879 of the participatory nodes will initiate homeostatic mechanisms that minimize the resultant  
880 degradation of behavior; thus, it is unsurprising that rodents remain able to produce gapes  
881 following ablation (King et al. (2015)) or disruption of GC (Li et al. (2016)) - in fact, the basic

882 gaping response to quinine is produced even in decerebrate rats (Grill and Norgren (1978b)).  
883 Nonetheless, we find that brief perturbations of GC do significantly alter these behaviors (as  
884 do lesions of other areas, such as gustatory thalamus, Grill and Norgren (1978b)), proving that  
885 far more than the minimal circuit is involved in triggering them *in situ*.

886 Longer disruptions of GC activity appear to have lasting effects that can confound the  
887 interpretation of their behavioral impact - our 2.5s long optogenetic perturbations delayed the  
888 onset of gaping even in control (no laser) trials. Such spillover effects may reflect cellular or  
889 network-level processes, but they cannot be attributed to cell death caused by the perturbation:  
890 in our case, similar optogenetic protocols have been shown to have no observable impact on  
891 cell integrity in GC, even for perturbations much longer than 2.5s (Maier et al. (2015), Flores  
892 et al. (2018)); furthermore, the same rats in later sessions produced normally-timed orofacial  
893 responses on the control trials. We suggest that, to at least some degree, such effects on behavior  
894 reflect the widespread nature of taste processing, and the status of GC as one participatory  
895 node.

896 Despite being just one node of this large network of brain regions, our brief perturbations  
897 reveal a temporally-specific role of GC in the driving of orofacial behavior - a role that could  
898 not be discerned through wholesale disruption of activity. This conclusion is bolstered by  
899 findings showing that: 1) even early - i.e., pre-transition - GC perturbations delay gaping; and  
900 2) palatability-related firing does not immediately return to normal levels following cessation  
901 of perturbation (as would be expected if GC was simply an output path reflecting processing  
902 performed elsewhere). Our 0.5s perturbations reveal that GC contributes to the instigation  
903 of a gaping bout but plays no role in the maintenance of gaping once it begins. These data  
904 suggest a dynamic flow of processing control within the larger taste network: modulatory signals  
905 propagate out of GC (signals that likely develop under the guidance of basolateral amygdala;  
906 Piette et al. (2012)) to influence the choice of a motor program in brainstem circuits, which  
907 is then implemented and controlled locally. At its heart, the proposed role of cortex in this  
908 model of taste processing has deep similarities to the role of neuromodulatory systems in the  
909 circuits underlying *Aplysia* feeding (Dacks and Weiss (2013)), leech swimming (Crisp and Mesce  
910 (2004)), control of gastric rhythms in the lobster and crab (Marder and Bucher (2007)), and  
911 rat whisking (Hattox et al. (2003)); in each, temporal aspects of rhythmic motor programs  
912 produced autonomously by a pattern generating circuit are influenced by descending signals.

913 The discreteness, coherence and inter-trial variability of GC ensemble dynamics has several  
914 attractor network-like properties (Hopfield (1982), Amit (1992)): 1) attractor networks with  
915 multiple quasi-stable states can reproduce the sudden switches of activity seen in GC ensem-  
916 bles (Miller and Katz (2010)); 2) the transition durations and state lifetime statistics of GC  
917 population dynamics are more in line with a dynamically switching attractor model than linear  
918 models of firing rate evolution (Jones et al. (2007), Sadacca et al. (2016)); and 3) nonlinear  
919 attractor-based circuits that exploit the noise inherent in neural processing more optimally  
920 perform the decision to ingest or expel a taste, which rats need no training to perform, than do  
921 linear integrating circuits (Miller and Katz (2013)). Our optogenetic protocol, with its mix of

922 inhibitory and excitatory effects, presumably introduces a transient disruption in such attrac-  
923 tor dynamics; such a perturbation is strong enough to transiently “knock” the network out of  
924 stability, but only if it hasn’t already settled into the eventual, decision-related stable state.

925 The finding that the involvement of GC in the gape instigation process appears to last  
926 almost precisely 50ms past the calculated transition times could conceivably be explained in  
927 many ways. Firstly, transitions between quasi-stable states of GC processing, however discrete,  
928 are certainly not instantaneous - the time constants of neural firing ensure that there is some  
929 finite (albeit small) amount of time across which the ensemble makes the “jump” from one  
930 state of activity to another. In addition, it is worth noting that both HMMs and change-  
931 point analysis techniques provide only a noisy estimate of state transition times, even if the  
932 transitions themselves were instantaneous. While both of these explanations have merit, it is  
933 also clear that the change-point analysis model, which must deal with a sudden change in  
934 firing introduced by the laser, identifies artifactual "change-points" close to the laser onset time  
935 on some of the trials, even if palatability firing actually began after the lasers were switched  
936 off. Our analysis suggests that some, if not all, of the seeming response delay following change-  
937 points occurring between 0.65 and 0.7s may be artifactual, which in turn suggests that GC  
938 perturbations may have no impact even scant milliseconds following ensemble transitions. It  
939 is worth noting in this context that gaping lags 0.2-0.3s behind the ensemble neural transition  
940 ([Sadacca et al. \(2016\)](#)); thus, it appears that GC becomes irrelevant following the emission of  
941 a “gape signal”, even before actual gaping has begun.

942 In this study, we focused exclusively on gapes, the orofacial responses that rats make to  
943 expel aversive tastes from the oral cavity. Pilot attempts to implant EMG electrodes in deeper  
944 muscles that control the distinctive consumption behaviors that occur in response to palatable  
945 tastes resulted in unacceptable levels of distress for the animals. This means that it remains  
946 (remotely) possible that gapes and LTPs are produced by separate cortical mechanisms ([Peng  
947 et al. \(2015\)](#)), and that therefore our results are informative only about aversion. We consider  
948 this possibility highly unlikely, however, for several reasons: 1) GC ensemble firing reflects  
949 the palatability of both appetitive and aversive tastes ([Figure 3, Katz et al. \(2001\)](#); also see  
950 [Fonseca et al. \(2018\)](#)), even if palatability is modified by learning ([Moran and Katz \(2014\)](#));  
951 2) the latency and inter-trial variability of the onset of palatability-related ensemble activity is  
952 similar for palatable and aversive tastes ([Sadacca et al. \(2016\)](#)); 3) there is considerable overlap  
953 in the brainstem circuits that underlie gapes and LTPs ([Travers et al. \(2000\)](#), [Chen and Travers  
954 \(2003\)](#), [Venugopal et al. \(2007\)](#), [Moore et al. \(2014\)](#)), resulting in similar latencies in the onset of  
955 LTPs and gapes after taste delivery ([Travers and Norgren \(1986\)](#)); and 4) independent analysis  
956 has suggested that orofacial behaviors reflecting aversiveness and palatableness lie on a single  
957 parametric continuum ([Breslin et al. \(1992\)](#)). These lines of evidence are consistent with the  
958 suggestion that cortex plays similar roles in the initiation of LTPs and gapes, which leads us to  
959 speculate that the transition of GC population activity to reflect stimulus palatability marks a  
960 shift in processing control, irrespective of the palatability of the tastant.

961 In summary, the balance of our results demonstrate a dynamic role for cortex in the pro-

962 censing of tastes; because this role involves ensemble activity states with variable trial-to-trial  
963 latencies, it cannot be discerned using standard analyses that average across trials. They reveal  
964 the importance of a unique moment in time that, despite being massively variable in latency  
965 from trial to trial, denotes a reliable shift of processing control - a modulatory signal emerging  
966 (at least partly) from cortical circuits that is passed (presumably) to a brainstem central pat-  
967 tern generator. These results suggest an attractor-like network of activity (although they could  
968 also be consistent with networks with thresholds), potentially spread across interconnected  
969 brain regions, underlying the animal's decision to ingest or expel the tastant in the mouth -  
970 perturbations to this network can disrupt its functioning transiently, but only if it has not yet  
971 settled into the final, behaviorally-relevant stable state.

## 972 5 Figures

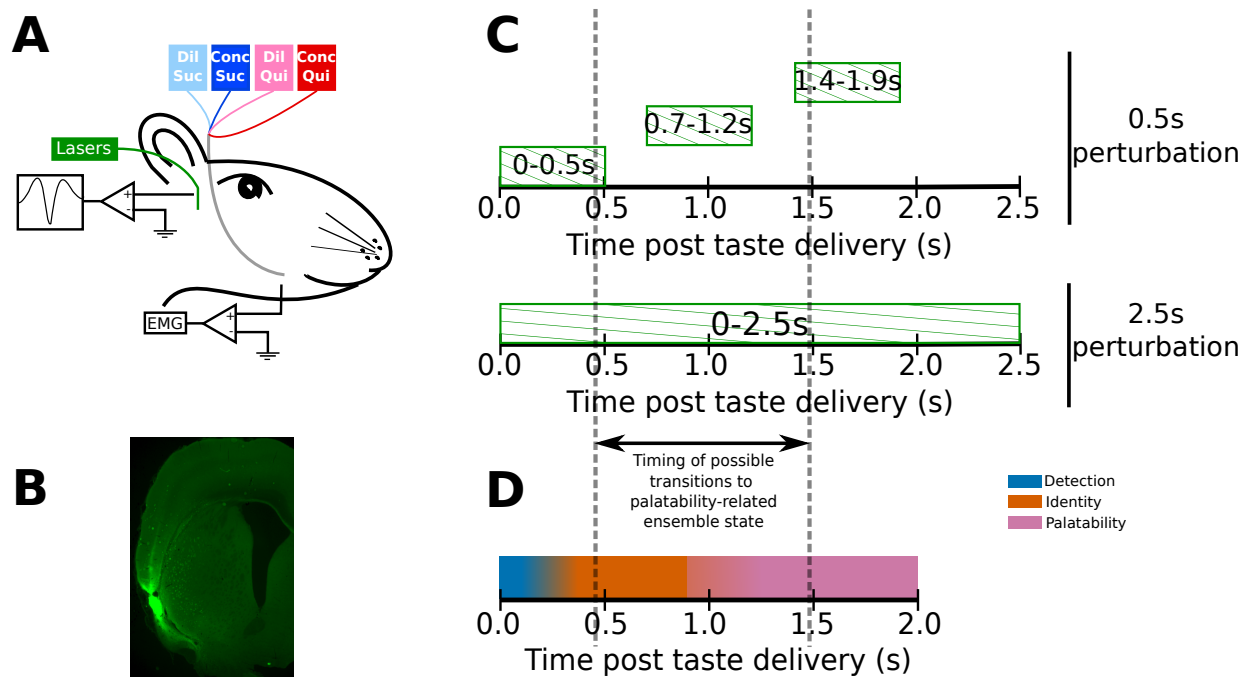

Figure 1: Experimental paradigm. **A**: 4-6 weeks after receiving surgeries for virus injections, rats were implanted with opto-trodes and EMG electrodes. Post recovery, they were given intra-oral infusions of Dil Suc (30mM Sucrose), Conc Suc (300mM Sucrose), Dil Qui (0.1mM Quinine-HCl) and Conc Qui (1mM Quinine-HCl), and ArchT-expressing GC neurons were briefly inhibited by green (532nm) laser light. **B**: Coronal slice from a subject, showing ArchT expression (visualized by the GFP tag) localized in gustatory cortex (GC). A small lesion, left by the tip of the opto-trode is visible in the middle of the GFP expressing region, had no general impact on behavior (see below). **C**: Inhibition protocol used in the study: two types of optogenetic perturbations, short (0.5s) or long (2.5s), were delivered in separate experimental sessions; short perturbations were delivered at one of three possible time points on any individual trial. Not shown, but delivered in all sessions, were control trials with no perturbations. Grey dashed lines mark the approximate range of the ensemble transitions to palatability/decision-related firing. **D**: A schematic of the temporal structure of single-neuron coding across the first 2.0s of taste responses in GC. Immediately following taste presentation, responses are nonspecific, indicating only the presence of fluid on the tongue (“detection” epoch). The next two temporal epochs of GC firing are taste specific: the first codes the physio-chemical identity of the stimulus (“identity” epoch); following a transition (that can happen anywhere between 0.5-1.5s post stimulus on individual trials, see grey dashed lines, and on average happens midway through this period) firing rates change to reflect palatability and the upcoming consumption decision (“palatability” epoch).

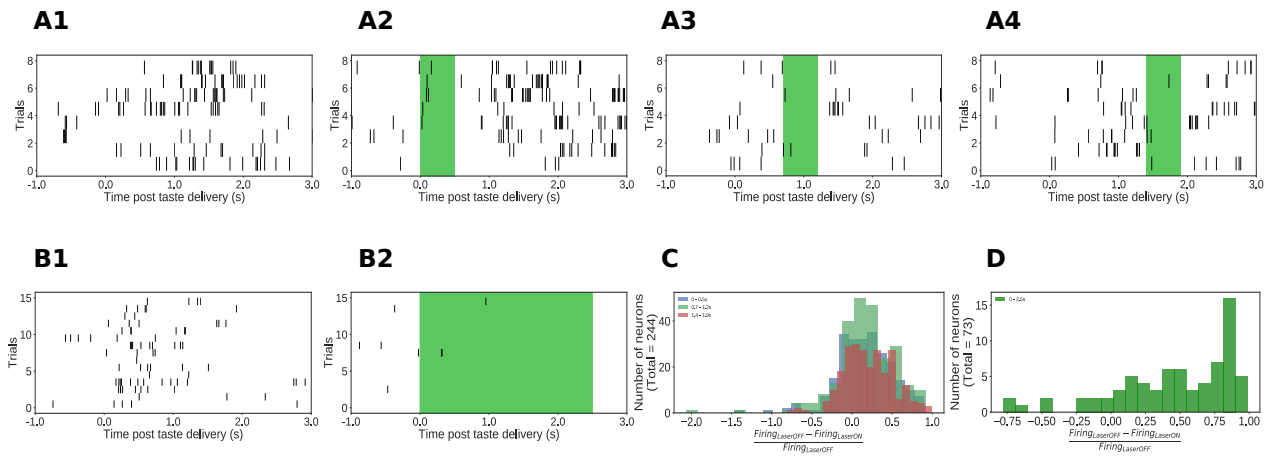

Figure 2: Impact of ArchT-mediated inhibition on GC neurons. **A1-A4**: Rasters of spiking in an example single GC neuron in a 0.5s-perturbation session; each hash mark is an action potential. Activity is robustly suppressed during laser stimulation. **B1-B2**: Analogous data from an example single GC neuron in a 2.5s perturbation session, also showing clear inhibition during laser stimulation. **C**: Histogram of changes in firing rates (plotted as a fraction of the firing rate on control trials, x-axis) produced by 0.5s perturbations across the entire sample (y-axis = number of neurons). The majority of neurons show robust firing suppression when perturbed (fraction  $> 0$ ), but a small group of neurons actually increased their firing rates in response to perturbation, presumably due to network-level effects (fraction  $< 0$ ). **D**: Analogous histogram of changes in firing rate produced by 2.5s perturbation. Almost all neurons were affected by the perturbation: the large majority are suppressed, but a small minority show elevated firing rates in response to perturbation.



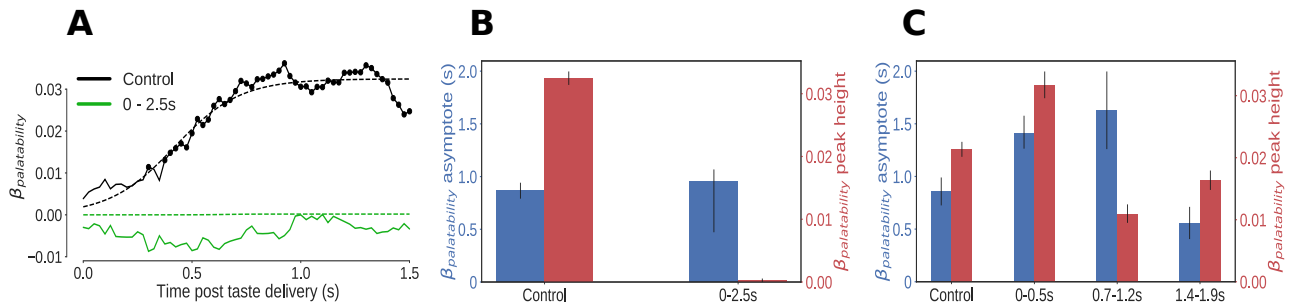

Figure 3: Impact of optogenetic perturbations on palatability relatedness of the firing of GC neurons. **A**: Coefficients (palatability-relatedness, y-axis) obtained from the regression of trial-averaged firing rates on palatability ranks of the taste stimuli across time (x-axis). The solid lines depict the mean regression coefficient across time for the entire data sample; coefficients significantly different from 0 at the 5% level are marked by dots. The dashed lines are logistic sigmoid fits for each condition. Disruption of GC firing for 2.5s wipes out the entirety of the palatability response. **B**: The post-stimulus latency (blue bars and y-axis) and magnitude (red bars and y-axis) of the peak (95% of the asymptote) of the sigmoid fits in **A**. Error bars denote 95% Bayesian credible intervals; differences are statistically significant at the 5% level if bars are not overlapping. On control (laser off) trials, GC neurons asymptote to peak palatability firing  $\sim 0.8$ s post stimulus. The 2.5s perturbation, by disrupting the palatability response completely, is fit by a flat sigmoid whose peak magnitude overlaps 0, although the latency to “peak” is similar to that of control trials. **C**: Analogous graph of post-stimulus latency (blue bars and y-axis) and magnitude (red bars and y-axis) of the peak (95% of the asymptote) of the sigmoid fits for each trial type in the 0.5s-perturbation sessions. Error bars denote 95% Bayesian credible intervals; differences are statistically significant at the 5% level if these error bars are not overlapping. On laser off trials, GC representation of palatability peaks  $\sim 0.8$ s after taste delivery, identical to the 2.5s perturbation control trials in **B**. Perturbations early (0-0.5s) and in the middle of the taste response (0.7-1.2s) delay the peak of palatability firing by  $\sim 0.5$ s; the magnitude of this peak, however, is the smallest for the middle perturbation. Perturbations late in the taste trial (1.4-1.9s), after palatability-related firing has mostly subsided, have (as expected) no impact compared to control trials.

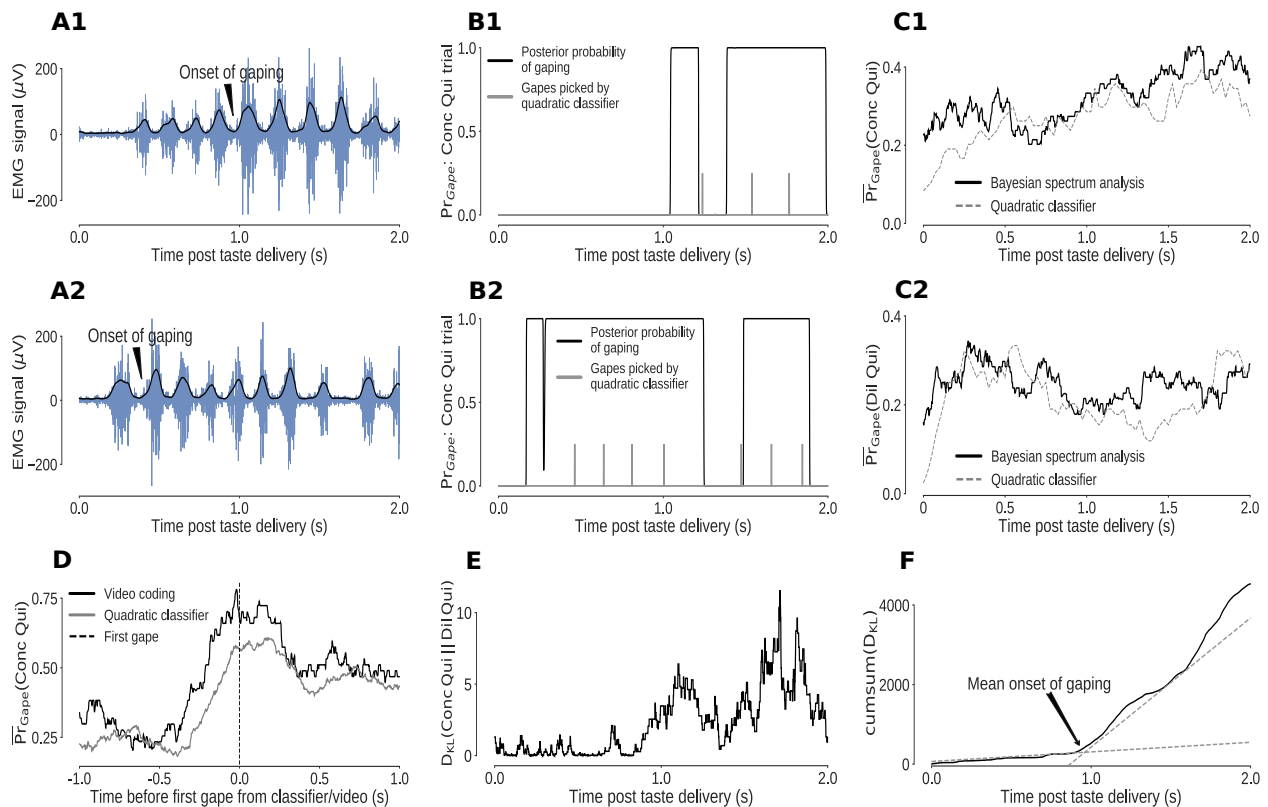

Figure 4: Bayesian spectrum analysis (BSA) of anterior digastric EMG recordings - probability of gaping calculated in terms of the total posterior probability of 4-6Hz movements. **A1-A2**: Two representative Conc Qui trials. The animal's mouth movements can be seen as bursts of higher-amplitude (y-axis) EMG activity (blue) following taste delivery - the onset of gaping, as detected on video, is marked. The time series of the envelope of the EMG signal (black line) are the data subjected to BSA. **B1-B2**: Result of BSA brought to bear on a pair of individual Conc Qui trials. The calculated probability of gaping (y-axis, black lines) matches up with individual gapes (grey vertical hash marks) picked by a previously published quadratic classifier that achieved 75% accuracy; while correlating well with the earlier technique, BSA avoids multiple pitfalls of that technique (and is easier to apply, see Methods). **C1-C2**: BSA (solid line) and the quadratic classifier (dotted line) produce similar estimates of trial-averaged probability of gaping in response to Dil Qui (**C1**) and Conc Qui (**C2**) on a set of control (laser off) trials. **D**: The probability of gaping from BSA rises reliably just before the first gape. Gaping probability was averaged across trials aligned by the time of the first gape, detected either on video (black) or by the quadratic classifier (grey). The black dashed line (0 on the x axis) indicates the occurrence of the first gape. **E**: KL divergence between the probability of gaping to Conc and Dil Qui (higher values indicate larger differences in their gaping distributions, same trials as in **B**). As expected, the distributions of gaping probability on Conc and Dil Qui trials are initially similar (while non-specific investigative licks happen) and diverge out at  $\sim 1$ s post stimulus once gaping begins. **F**: The cumulative sum of the KL divergence in **E** across time. The jump in KL divergence around the mean onset time of gaping is seen as a change in slope of its cumulative sum. We fit two straight lines to the cumulative sum and pick their intersection as the mean onset of gaping across this set of trials.

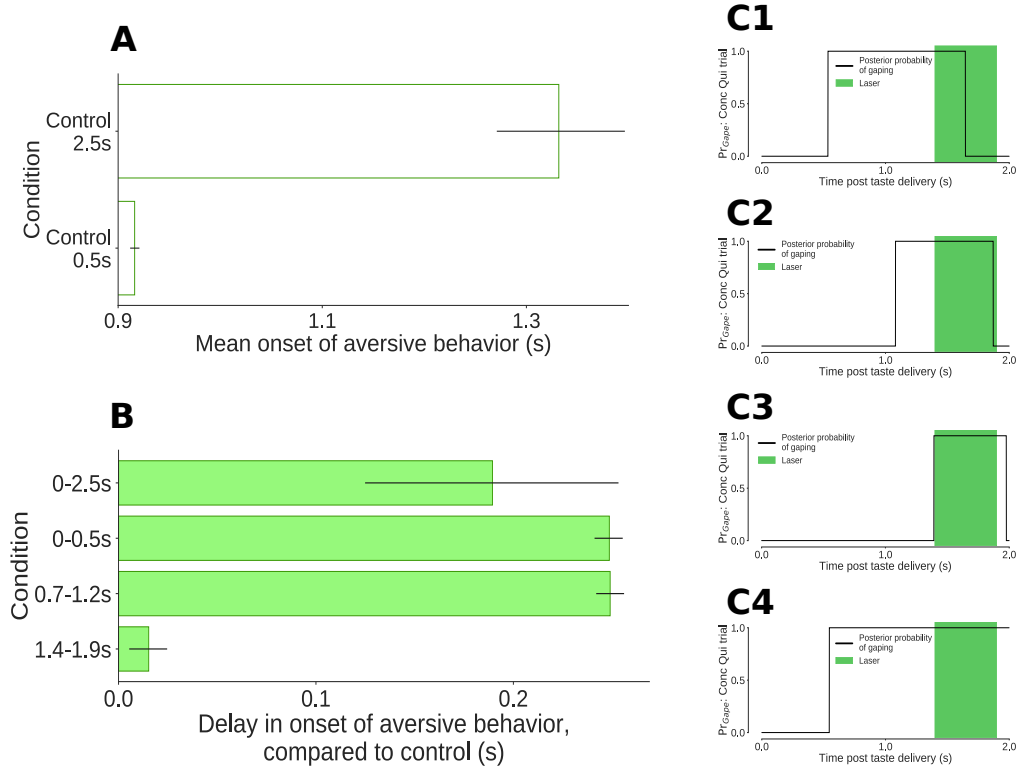

Figure 5: Onset times of 4-6Hz aversive orofacial behaviors (gapes) under different conditions. **A:** Onset of aversive orofacial behaviors in control (no laser) trials in 0.5s and 2.5s perturbation sessions. The x-axis presents the mean gape onset times; the extent of their 95% Bayesian credible intervals are shown in the error bars. Non-overlapping error bars depict statistical significance at the 5% level. The 2.5s controls show a delayed onset, likely due to lasting effects of the (relatively) long optogenetic perturbation. **B:** Delay in the onset of aversive orofacial behaviors (compared to control trials) with 2.5s perturbation (top bar), and in the different 0.5s laser trials, with the same conventions as **A**. Early (0-0.5s) and mid-trial (0.7-1.2s) perturbations of the taste response delay the onset of gaping (to the same degree as 2.5s perturbation). The delay in the onset of gaping is insignificant if GC neurons are disrupted late in the trial (1.4-1.9s). **C1-C4:** Four representative Conc Qui trials with optogenetic disruption from 1.4-1.9s post taste delivery. On each of these trials, the probability of 4-6Hz aversive orofacial responses is unaffected by the onset of the laser, confirming that GC perturbation fails to disrupt ongoing bouts of gaping.

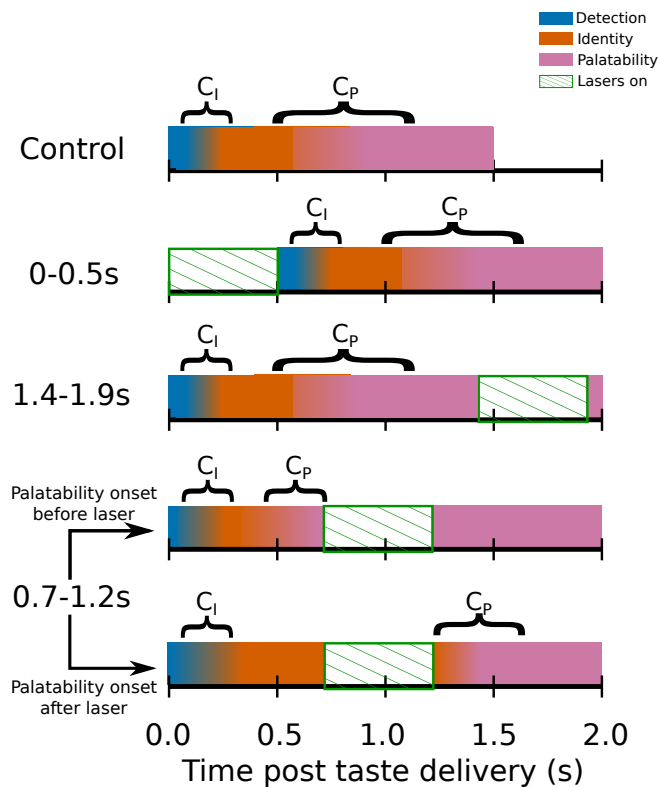

Figure 6: Switchpoint model of GC ensemble responses to tastes, which were assumed (on the basis of our previous work) to consist of 3 states as follows: 1) **Detection**: a brief, initial state of nonspecific responses with identical population distributions of activity for each tastant in our battery; 2) **Identity**: responses related to the chemical identity of the taste stimulus with 2 population firing rate distributions, one each for Suc and Qui; 3) **Palatability**: population firing rich in palatability and consumption-decision related information with 4 population distributions of activity, one for each of the 4 tastants in our stimulus battery. The model assumed that the transitions between these states could not occur during the optogenetic perturbation of GC (denoted by periods of green diagonally hatched regions): each row shows how the search for change points is hypothesized to be impacted by GC perturbation; note the two distinct possibilities with regard to 0.7-1.2s trials.

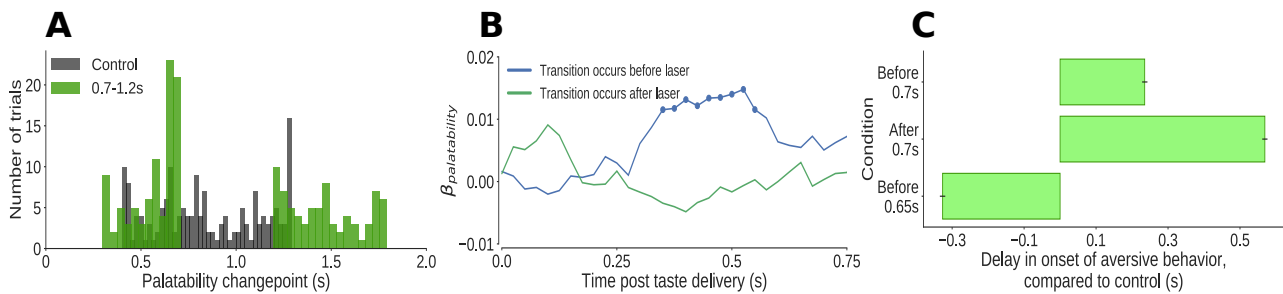

Figure 7: The impact of 0.7-1.2s perturbation on GC neural activity and aversive orofacial behavior varies from trial to trial, depending on the progress of taste dynamics. **A**: Distribution of change-points into the palatability-related ensemble state identified in Qui trials (in green). We could not examine the time period of perturbation, from 0.7s to 1.2s, because firing during this period was deeply confounded by laser-induced inhibition: as we concatenated the pre- and post-perturbation periods, an abnormally large number of change points are localized to the time of splicing (compare to change points identified in control trials, in grey). **B**: Correlation (quantified in terms of coefficient of regression) of trial-averaged firing rates of GC neurons with palatability of the taste stimuli in two subsets of trials - those in which the ensemble transition into palatability-related firing was identified to have occurred prior to perturbation (blue line), and those in which it did not (green line). Coefficients significantly different from 0 at the 5% level are marked by dots; these coefficients differ from 0 only within the trials in which the palatability-related ensemble state appeared before the onset of perturbation. **C**: The impact of 0.7-1.2s GC perturbation on the onset of aversive orofacial behavior, quantified in terms of the delay of behavior onset compared to control trials (x-axis). The onset of gaping is delayed significantly more if the perturbation begins before palatability information has appeared in ensemble activity than if it does not - but even on these trials behavior is significantly delayed. When we drop the subset of trials in which transition times into palatability-related firing occur within 50ms of 0.7s (a subset that likely contains artifactually identified transitions), however, gaping on transition-before-perturbation trials is revealed to happen earlier than on control trials - the expected result (see text).

## 973 **6 Acknowledgements**

974 This project was supported by the National Institutes of Health (NIH) R01 grants DC006666-00  
975 and DC007703-06 (Donald Katz) and an International Predoctoral Fellowship from the Howard  
976 Hughes Medical Institute (HHMI) (Narendra Mukherjee). Computing resources for this project  
977 were provided by the National Science Foundation (NSF) XSEDE grant IBN180002 (Donald  
978 Katz) and by the high-performance computing cluster (HPCC) at Brandeis University. We  
979 would like to thank Dr. Paul Miller for invaluable feedback about this study and manuscript,  
980 and Shrabastee Banerjee and Dr. Jian-You Lin for many hours of consultation on building  
981 accurate and interpretive statistical models for our data.

## 982 **7 Declaration of interests**

983 The authors declare no competing financial interests.

## 984 References

- 985 Brian D Allen, Annabelle C Singer, and Edward S Boyden. Principles of designing interpretable  
986 optogenetic behavior experiments. *Learning & Memory*, 22(4):232–238, 2015.
- 987 Daniel J Amit. *Modeling brain function: The world of attractor neural networks*. Cambridge  
988 university press, 1992.
- 989 Dominik F Aschauer, Sebastian Kreuz, and Simon Rumpel. Analysis of transduction efficiency,  
990 tropism and axonal transport of aav serotypes 1, 2, 5, 6, 8 and 9 in the mouse brain. *PloS*  
991 *one*, 8(9):e76310, 2013.
- 992 Madelyn A Baez-Santiago, Emily E Reid, Anan Moran, Joost X Maier, Yasmin Marrero-Garcia,  
993 and Donald B Katz. Dynamic taste responses of parabrachial pontine neurons in awake rats.  
994 *Journal of neurophysiology*, 115(3):1314–1323, 2016.
- 995 Kent C Berridge and Elliot S Valenstein. What psychological process mediates feeding evoked  
996 by electrical stimulation of the lateral hypothalamus? *Behavioral neuroscience*, 105(1):3,  
997 1991.
- 998 Christopher M Bishop. *Pattern recognition and machine learning*. Springer-Verlag New York,  
999 2016.
- 1000 Paul A Breslin, Alan C Spector, and Harvey J Grill. A quantitative comparison of taste  
1001 reactivity behaviors to sucrose before and after lithium chloride pairings: a unidimensional  
1002 account of palatability. *Behavioral neuroscience*, 106(5):820, 1992.
- 1003 G Larry Bretthorst. *Bayesian spectrum analysis and parameter estimation*, volume 48. Springer  
1004 Science & Business Media, 2013.
- 1005 Zhixiong Chen and Joseph B Travers. Inactivation of amino acid receptors in medullary retic-  
1006 ular formation modulates and suppresses ingestion and rejection responses in the awake rat.  
1007 *American Journal of Physiology-Regulatory, Integrative and Comparative Physiology*, 285(1):  
1008 R68–R83, 2003.
- 1009 Young K Cho, Cheng-Shu Li, and David V Smith. Descending influences from the lateral  
1010 hypothalamus and amygdala converge onto medullary taste neurons. *Chemical Senses*, 28  
1011 (2):155–171, 2003.
- 1012 Kevin M Crisp and Karen A Mesce. A cephalic projection neuron involved in locomotion is dye  
1013 coupled to the dopaminergic neural network in the medicinal leech. *Journal of Experimental*  
1014 *Biology*, 207(26):4535–4542, 2004.
- 1015 Sébastien M Crouzet, Niko A Busch, and Kathrin Ohla. Taste quality decoding parallels taste  
1016 sensations. *Current Biology*, 25(7):890–896, 2015.

- 1017 Andrew M Dacks and Klaudiusz R Weiss. Latent modulation: a basis for non-disruptive  
1018 promotion of two incompatible behaviors by a single network state. *Journal of Neuroscience*,  
1019 33(9):3786–3798, 2013.
- 1020 Alexander J Denman, Joshua D Sammons, Jonathan D Victor, and Patricia M Di Lorenzo.  
1021 Heterogeneity of neuronal responses in the nucleus of the solitary tract suggests sensorimotor  
1022 integration in the neural code for taste. *Journal of Neurophysiology*, 2018.
- 1023 Patricia M Di Lorenzo. The neural code for taste in the brain stem: response profiles. *Physiology*  
1024 *& behavior*, 69(1-2):87–96, 2000.
- 1025 Patricia M Di Lorenzo and Christian H Lemon. The neural code for taste in the nucleus of the  
1026 solitary tract of the rat: effects of adaptation. *Brain research*, 852(2):383–397, 2000.
- 1027 Lisa A Dinardo and Joseph B Travers. Hypoglossal neural activity during ingestion and rejection  
1028 in the awake rat. *Journal of neurophysiology*, 72(3):1181–1191, 1994.
- 1029 Veronica L Flores, Tamar Parmet, Narendra Mukherjee, Sacha Nelson, Donald B Katz, and  
1030 David Levitan. The role of the gustatory cortex in incidental experience-evoked enhancement  
1031 of later taste learning. *Learning & Memory*, 25(11):587–600, 2018.
- 1032 Esmeralda Fonseca, Victor de Lafuente, Sidney A Simon, and Ranier Gutierrez. Sucrose inten-  
1033 sity coding and decision-making in rat gustatory cortices. *eLife*, 7:e41152, 2018.
- 1034 Alfredo Fontanini and Donald B Katz. State-dependent modulation of time-varying gustatory  
1035 responses. *Journal of neurophysiology*, 96(6):3183–3193, 2006.
- 1036 Alfredo Fontanini, Stephen E Grossman, Joshua A Figueroa, and Donald B Katz. Distinct  
1037 subtypes of basolateral amygdala taste neurons reflect palatability and reward. *Journal of*  
1038 *Neuroscience*, 29(8):2486–2495, 2009.
- 1039 Andrew Gelman, Kenneth Shirley, et al. Inference from simulations and monitoring conver-  
1040 gence. *Handbook of markov chain monte carlo*, pages 163–174, 2011.
- 1041 Andrew Gelman, Hal S Stern, John B Carlin, David B Dunson, Aki Vehtari, and Donald B  
1042 Rubin. *Bayesian data analysis*. Chapman and Hall/CRC, 2013.
- 1043 Emma Granqvist, Giles ED Oldroyd, and Richard J Morris. Automated bayesian model de-  
1044 velopment for frequency detection in biological time series. *BMC systems biology*, 5(1):97,  
1045 2011.
- 1046 Emma Granqvist, Matthew Hartley, and Richard J Morris. Basar—a tool in r for frequency  
1047 detection. *Biosystems*, 110(1):60–63, 2012.
- 1048 Harvey J Grill and Ralph Norgren. The taste reactivity test. i. mimetic responses to gustatory  
1049 stimuli in neurologically normal rats. *Brain research*, 143(2):263–279, 1978a.



- 1050 Harvey J Grill and Ralph Norgren. The taste reactivity test. ii. mimetic responses to gustatory  
1051 stimuli in chronic thalamic and chronic decerebrate rats. *Brain research*, 143(2):281–297,  
1052 1978b.
- 1053 Stephen E Grossman, Alfredo Fontanini, Jeffrey S Wieskopf, and Donald B Katz. Learning-  
1054 related plasticity of temporal coding in simultaneously recorded amygdala–cortical ensembles.  
1055 *Journal of Neuroscience*, 28(11):2864–2873, 2008.
- 1056 Xue Han, Brian Y Chow, Huihui Zhou, Nathan C Klapoetke, Amy Chuong, Reza Rajimehr,  
1057 Aimei Yang, Michael V Baratta, Jonathan Winkle, Robert Desimone, et al. A high-light  
1058 sensitivity optical neural silencer: development and application to optogenetic control of  
1059 non-human primate cortex. *Frontiers in systems neuroscience*, 5:18, 2011.
- 1060 Alexis Hattox, Ying Li, and Asaf Keller. Serotonin regulates rhythmic whisking. *Neuron*, 39  
1061 (2):343–352, 2003.
- 1062 Anh Son Ho, Etsuro Hori, Phuong Hong Thi Nguyen, Susumu Urakawa, Takashi Kondoh,  
1063 Kunio Torii, Taketoshi Ono, and Hisao Nishijo. Hippocampal neuronal responses during  
1064 signaled licking of gustatory stimuli in different contexts. *Hippocampus*, 21(5):502–519, 2011.
- 1065 Matthew D Hoffman and Andrew Gelman. The no-u-turn sampler: adaptively setting path  
1066 lengths in hamiltonian monte carlo. *Journal of Machine Learning Research*, 15(1):1593–1623,  
1067 2014.
- 1068 John J Hopfield. Neural networks and physical systems with emergent collective computational  
1069 abilities. *Proceedings of the national academy of sciences*, 79(8):2554–2558, 1982.
- 1070 Stephen J Huston and Vivek Jayaraman. Studying sensorimotor integration in insects. *Current*  
1071 *opinion in neurobiology*, 21(4):527–534, 2011.
- 1072 Ahmad Jezzini, Luca Mazzucato, Giancarlo La Camera, and Alfredo Fontanini. Processing  
1073 of hedonic and chemosensory features of taste in medial prefrontal and insular networks.  
1074 *Journal of Neuroscience*, 33(48):18966–18978, 2013.
- 1075 Lauren M Jones, Alfredo Fontanini, Brian F Sadacca, Paul Miller, and Donald B Katz. Natural  
1076 stimuli evoke dynamic sequences of states in sensory cortical ensembles. *Proceedings of the*  
1077 *National Academy of Sciences*, 104(47):18772–18777, 2007.
- 1078 Donald B Katz and Brian F Sadacca. 6 taste. *Neurobiology of Sensation and Reward*, page  
1079 127, 2011.
- 1080 Donald B Katz, SA Simon, and Miguel AL Nicolelis. Dynamic and multimodal responses of  
1081 gustatory cortical neurons in awake rats. *Journal of Neuroscience*, 21(12):4478–4489, 2001.
- 1082 Camille Tessitore King, Koji Hashimoto, Ginger D Blonde, and Alan C Spector. Unconditioned  
1083 oromotor taste reactivity elicited by sucrose and quinine is unaffected by extensive bilateral  
1084 damage to the gustatory zone of the insular cortex in rats. *Brain research*, 1599:9–19, 2015.

- 1085 Eva Kosar, Harvey J Grill, and Ralph Norgren. Gustatory cortex in the rat. i. physiological  
1086 properties and cytoarchitecture. *Brain research*, 379(2):329–341, 1986.
- 1087 Ikue Kusumoto-Yoshida, Haixin Liu, Billy T Chen, Alfredo Fontanini, and Antonello Bonci.  
1088 Central role for the insular cortex in mediating conditioned responses to anticipatory cues.  
1089 *Proceedings of the National Academy of Sciences*, 112(4):1190–1195, 2015.
- 1090 Cheng-Shu Li and Young K Cho. Efferent projection from the bed nucleus of the stria ter-  
1091 minalis suppresses activity of taste-responsive neurons in the hamster parabrachial nuclei.  
1092 *American Journal of Physiology-Regulatory, Integrative and Comparative Physiology*, 291(4):  
1093 R914–R926, 2006.
- 1094 Cheng-Shu Li, Young K Cho, and David V Smith. Modulation of parabrachial taste neurons  
1095 by electrical and chemical stimulation of the lateral hypothalamus and amygdala. *Journal*  
1096 *of neurophysiology*, 93(3):1183–1196, 2005.
- 1097 Jennifer X Li, Takashi Yoshida, Kevin J Monk, and Donald B Katz. Lateral hypothalamus  
1098 contains two types of palatability-related taste responses with distinct dynamics. *Journal of*  
1099 *Neuroscience*, 33(22):9462–9473, 2013.
- 1100 Jennifer X Li, Joost X Maier, Emily E Reid, and Donald B Katz. Sensory cortical activity is  
1101 related to the selection of a rhythmic motor action pattern. *Journal of Neuroscience*, 36(20):  
1102 5596–5607, 2016.
- 1103 Gerald E Loeb and Carl Gans. *Electromyography for experimentalists*. University of Chicago  
1104 Press, 1986.
- 1105 Arianna Maffei, Melissa Haley, and Alfredo Fontanini. Neural processing of gustatory informa-  
1106 tion in insular circuits. *Current opinion in neurobiology*, 22(4):709–716, 2012.
- 1107 Joost X Maier and Donald B Katz. Neural dynamics in response to binary taste mixtures.  
1108 *Journal of neurophysiology*, 109(8):2108–2117, 2013.
- 1109 Joost X Maier, Meredith L Blankenship, Jennifer X Li, and Donald B Katz. A multisensory  
1110 network for olfactory processing. *Current Biology*, 25(20):2642–2650, 2015.
- 1111 Eve Marder and Dirk Bucher. Understanding circuit dynamics using the stomatogastric nervous  
1112 system of lobsters and crabs. *Annu. Rev. Physiol.*, 69:291–316, 2007.
- 1113 Luca Mazzucato, Alfredo Fontanini, and Giancarlo La Camera. Dynamics of multistable states  
1114 during ongoing and evoked cortical activity. *Journal of Neuroscience*, 35(21):8214–8231,  
1115 2015.
- 1116 Richard McElreath. *Statistical rethinking*. texts in statistical science, 2015.
- 1117 Paul Miller. Dynamical systems, attractors, and neural circuits. *F1000Research*, 5, 2016.

- 1118 Paul Miller and Donald B Katz. Stochastic transitions between neural states in taste processing  
1119 and decision-making. *Journal of Neuroscience*, 30(7):2559–2570, 2010.
- 1120 Paul Miller and Donald B Katz. Accuracy and response-time distributions for decision-making:  
1121 linear perfect integrators versus nonlinear attractor-based neural circuits. *Journal of compu-*  
1122 *tational neuroscience*, 35(3):261–294, 2013.
- 1123 Jeffrey D Moore, David Kleinfeld, and Fan Wang. How the brainstem controls orofacial behav-  
1124 iors comprised of rhythmic actions. *Trends in neurosciences*, 37(7):370–380, 2014.
- 1125 Anan Moran and Donald B Katz. Sensory cortical population dynamics uniquely track behavior  
1126 across learning and extinction. *Journal of Neuroscience*, 34(4):1248–1257, 2014.
- 1127 Narendra Mukherjee, Joseph Wachutka, and Donald B Katz. Python meets systems neuro-  
1128 science: affordable, scalable and open-source electrophysiology in awake, behaving rodents.  
1129 2017.
- 1130 Hisao Nishijo, Teruko Uwano, Ryoji Tamura, and Taketoshi Ono. Gustatory and multimodal  
1131 neuronal responses in the amygdala during licking and discrimination of sensory stimuli in  
1132 awake rats. *Journal of neurophysiology*, 79(1):21–36, 1998.
- 1133 Ralph Norgren. Taste pathways to hypothalamus and amygdala. *Journal of Comparative*  
1134 *Neurology*, 166(1):17–30, 1976.
- 1135 George Paxinos and Charles Watson. *The Rat Brain in Stereotaxic Coordinates in Stereotaxic*  
1136 *Coordinates*. Elsevier, 2007.
- 1137 Yueqing Peng, Sarah Gillis-Smith, Hao Jin, Dimitri Tränkner, Nicholas JP Ryba, and Charles S  
1138 Zuker. Sweet and bitter taste in the brain of awake behaving animals. *Nature*, 527(7579):  
1139 512, 2015.
- 1140 MI Phillips and RE Norgren. A rapid method for permanent implantation of an intraoral fistula  
1141 in rats. *Behavior Research Methods & Instrumentation*, 2(3):124–124, 1970.
- 1142 Caitlin E Piette, Madelyn A Baez-Santiago, Emily E Reid, Donald B Katz, and Anan Moran.  
1143 Inactivation of basolateral amygdala specifically eliminates palatability-related information  
1144 in cortical sensory responses. *Journal of Neuroscience*, 32(29):9981–9991, 2012.
- 1145 Wolfgang Prinz. Perception and action planning. *European journal of cognitive psychology*, 9  
1146 (2):129–154, 1997.
- 1147 Christopher A Riley and Michael S King. Differential effects of electrical stimulation of the  
1148 central amygdala and lateral hypothalamus on fos-immunoreactive neurons in the gustatory  
1149 brainstem and taste reactivity behaviors in conscious rats. *Chemical senses*, 38(8):705–717,  
1150 2013.

- 1151 Brian F Sadacca, Jason T Rothwax, and Donald B Katz. Sodium concentration coding gives  
1152 way to evaluative coding in cortex and amygdala. *Journal of Neuroscience*, 32(29):9999–  
1153 10011, 2012.
- 1154 Brian F Sadacca, Narendra Mukherjee, Tony Vladusich, Jennifer X Li, Donald B Katz, and  
1155 Paul Miller. The behavioral relevance of cortical neural ensemble responses emerges suddenly.  
1156 *Journal of Neuroscience*, 36(3):655–669, 2016.
- 1157 John Salvatier, Thomas V Wiecki, and Christopher Fonnesbeck. Probabilistic programming in  
1158 python using pymc3. *PeerJ Computer Science*, 2:e55, 2016.
- 1159 Chad L Samuelsen and Alfredo Fontanini. Processing of intraoral olfactory and gustatory  
1160 signals in the gustatory cortex of awake rats. *Journal of Neuroscience*, pages 1926–16, 2016.
- 1161 Chad L Samuelsen, Matthew PH Gardner, and Alfredo Fontanini. Effects of cue-triggered  
1162 expectation on cortical processing of taste. *Neuron*, 74(2):410–422, 2012.
- 1163 SJ Shammah-Lagnado, MSMO Costa, and JA Ricardo. Afferent connections of the parvocel-  
1164 lular reticular formation: a horseradish peroxidase study in the rat. *Neuroscience*, 50(2):  
1165 403–425, 1992.
- 1166 David V Smith and Steven J St John. Neural coding of gustatory information. *Current opinion*  
1167 *in neurobiology*, 9(4):427–435, 1999.
- 1168 Joseph Travers, Lisa DiNardo, and Hamid Karimnamazi. Medullary reticular formation activity  
1169 during ingestion and rejection in the awake rat. *Experimental brain research*, 130(1):78–92,  
1170 2000.
- 1171 Joseph B Travers and Ralph Norgren. Electromyographic analysis of the ingestion and rejection  
1172 of sapid stimuli in the rat. *Behavioral neuroscience*, 100(4):544, 1986.
- 1173 Joseph B Travers, Lisa A Dinardo, and Hamid Karimnamazi. Motor and premotor mechanisms  
1174 of licking. *Neuroscience & Biobehavioral Reviews*, 21(5):631–647, 1997.
- 1175 Sharmila Venugopal, Joseph B Travers, and David H Terman. A computational model for  
1176 motor pattern switching between taste-induced ingestion and rejection oromotor behaviors.  
1177 *Journal of computational neuroscience*, 22(2):223–238, 2007.
- 1178 Daniel M Wolpert and Zoubin Ghahramani. Computational principles of movement neuro-  
1179 science. *Nature neuroscience*, 3(11s):1212, 2000.
- 1180 Daniel M Wolpert and Mitsuo Kawato. Multiple paired forward and inverse models for motor  
1181 control. *Neural networks*, 11(7-8):1317–1329, 1998.
- 1182 Daniel M Wolpert, Zoubin Ghahramani, and Michael I Jordan. An internal model for sensori-  
1183 motor integration. *Science*, 269(5232):1880–1882, 1995.

- 1184 Takashi Yamamoto, Ryuji Matsuo, Yoshitaka Kiyomitsu, and Ryuji Kitamura. Response prop-  
1185 erties of lateral hypothalamic neurons during ingestive behavior with special reference to  
1186 licking of various taste solutions. *Brain research*, 481(2):286–297, 1989.
- 1187 Ofer Yizhar, Lief E Fenno, Thomas J Davidson, Murtaza Mogri, and Karl Deisseroth. Opto-  
1188 genetics in neural systems. *Neuron*, 71(1):9–34, 2011.
- 1189 Guixin Zhang and Kazushige Sasamoto. Projections of two separate cortical areas for rhyth-  
1190 mical jaw movements in the rat. *Brain research bulletin*, 24(2):221–230, 1990.
